# Supplementary material for: A Comprehensive Meta-analysis of Case–Control Association Studies to Evaluate Polymorphisms Associated with the Risk of Differentiated Thyroid Carcinoma
Source: Oxford University Press journal article supplement (doi:10.1158/1055-9965.epi-15-0652), 2016-02-03
Supplement: 10559965epi150652-sup-151369_3_supp_3310417_f0xq57.docx [file 10559965epi150652-sup-151369_3_supp_3310417_f0xq57.docx]

**Table S1.** Comparison between results from literature and results from the present GWAS for all the SNPs extracted from literature.

| **Gene or Locus** | **dbSNP ID; Variant** | **Reference** | **Cases** | **Contr.** | **Pop.** | **Published allelic OR** | **Allelic OR**  **(present GWAS)** | **Published OR for the additive model** | **OR of the additive model**  **(present GWAS)** |
| --- | --- | --- | --- | --- | --- | --- | --- | --- | --- |
| **DNA repair** | | | | | | | | | |
| *ADPRT* | rs1136410; Val762Ala | Santos et al.,2012(1) | 108 | 216 | Ca | 1.29 (0.79-2.10) | 0.93 (0.73-1.19) | 1.35 (0.79-2.29)a | 0.96 (0.72-1.27)a |
|  |  |  |  |  |  |  |  | - | 0.73 (0.29-1.81)b |
|  |  | Chiang et al.,2008(2) | 283 | 469 | As | 1.19 (0.97-1.48) |  | 1.42 (0.93-2.17)a |  |
|  |  |  |  |  |  |  |  | 1.28 (0.93-1.75)b |  |
| *ALKBH3* | rs10838192 | Neta et al.,2011(3) | 344 | 452 | Ca | **-** | 1.03 (0.84-1.28) | **1.74 (1.25-2.41)**a | 1.12 (0.86-1.45)a |
|  |  |  |  |  |  |  |  | **2.33 (1.05-5.17)**b | 0.88 (0.51-1.54)b |
| *APEX1* | rs1130409; Asp148Glu | Sigurdson et al.,2009(4) | 865 | 887 | Ca | 1.05 (0.92-1.09) | 0.95 (0.79-1.13) | 1.18 (0.96-1.46)a | 0.80 (0.61-1.06)a |
|  |  |  |  |  |  |  |  | 1.06 (0.81-1.40)b | 0.96 (0.66-1.38)b |
|  |  | Santos et al.,2012(1) | 78 | 217 | Ca | 0.90 (0.65-1.24 |  | 0.91 (0.53-1.58)a |  |
|  |  |  |  |  |  |  |  | 0.81 (0.43-1.53)b |  |
|  |  | Chiang et al.,2008(2) | 283 | 469 | As | 1.09 (0.88-1.34) |  | 1.07 (0.77-1.48)a |  |
|  |  |  |  |  |  |  |  | 1.18 (0.77-1.81)b |  |
| *ATM* | rs609429; IVS48+238C>G | Akulevich et al.,2009(5) | 254 | 594 | Ca | 1.10 (0.89-1.36) | 1.09 (0.90-1.32) | 1.11 (0.80-1.55)a | 1.07 (0.83-1.38)a |
|  |  |  |  |  |  |  |  | 1.21 (0.78-1.87)b | 1.23 (0.78-1.93) |
| *ATM* | rs664677; IVS22-77T>C | Akulevich et al.,2009(5) | 255 | 593 | Ca | 1.08 (0.87-1.33) | LD with rs609429 | 1.06 (0.76-1.47)a | LD with rs609429 |
|  |  |  |  |  |  |  |  | 1.20 (0.75-1.91)b |  |
|  |  | Gu et al.,2013(6) | 354 | 360 | As | 1.04 (0.84-1.29) |  | 1.17 (0.84-1.62)a |  |
|  |  |  |  |  |  |  |  | 1.03 (0.66-1.61)b |  |
| *ATM* | rs189037; -570C>T | Gu et al.,2013(6) | 355 | 360 | As | 1.07 (0.87-1.31) | LD with rs609429 | 1.18 (0.83-1.66)a | LD with rs609429 |
|  |  |  |  |  |  |  |  | 1.13 (0.73-1.76)b |  |
| *ATM* | rs1800054; 146C>G | Xu et al.,2012(7) | 592 | 884 | Mi | 1.50 (0.75-3.01) |  | 1.51 (0.75-3.04)a |  |
|  |  |  |  |  |  |  |  | - |  |
| *ATM* | rs4986761; Ser707Pro | Xu et al.,2012(7) | 592 | 882 | Mi | 1.22 (0.65-2.29) |  | 1.23 (0.65-2.31)a |  |
|  |  |  |  |  |  |  |  | - |  |
| *ATM* | rs1801516; Asp1853Asn | Akulevich et al.,2009(5) | 254 | 596 | Ca | **0.71 (0.52-0.97)** |  | 0.74 (0.51-1.06)a |  |
|  |  |  |  |  |  |  |  | 0.49 (0.18-1.31)b |  |
| *ATM* | rs373759 | Gu et al.,2013(6) | 354 | 360 | As | 1.02 (0.83-1.27) |  | 1.32 (0.96-1.82)a |  |
|  |  |  |  |  |  |  |  | 0.88 (0.56-1.39)b |  |
| *ATM* | rs4988099 | Gu et al.,2013(6) | 353 | 360 | As | 1.02 (0.64-1.63) |  | 1.09 (0.66-1.79)a |  |
|  |  |  |  |  |  |  |  | 0.51 (0.05-5.68)b |  |
| *BRCA1* | rs799917; Pro871Leu | Sturgis et al.,2005(8) | 131 | 163 | Ca | 0.81 (0.57-1.15) | 1.04 (0.86-1.25) | 0.83 (0.51-1.35)a | 1.04 (0.80-1.34)a |
|  |  |  |  |  |  |  |  | 0.66 (0.30-1.45)b | 1.08 (0.72-1.61)b |
|  |  | Xu et al.,2012(9) | 303 | 511 | Mi | 0.86 (0.69-1.05) |  | 0.77 (0.56-1.05)a |  |
|  |  |  |  |  |  |  |  | 0.80 (0.53-1.22)b |  |
| *BRCA1* | rs16941; Glu1038Gly | Sturgis et al.,2005(8) | 134 | 165 | Ca | 0.81 (0.57-1.14) |  | 0.90 (0.55-1.46)a | LD with rs799917 |
|  |  |  |  |  |  |  |  | 0.61 (0.28-1.32)b |  |
|  |  | Xu et al.,2012(9) | 303 | 511 | Mi | 0.90 (0.73-1.12) |  | 0.74 (0.55-1.01)a |  |
|  |  |  |  |  |  |  |  | 1.00 (0.62-1.59)b |  |
| *BRCA1* | rs16942; Lys1183Arg | Sturgis et al.,2005(8) | 129 | 165 | Ca | 0.73 (0.51-1.05) | LD with rs799917 | 0.80 (0.49-1.29)a | LD with rs799917 |
|  |  |  |  |  |  |  |  | 0.41 (0.15-1.10)b |  |
|  |  | Xu et al.,2012(9) | 303 | 511 | Mi | 0.85 (0.68-1.06) |  | **0.73 (0.54-0.99)a** |  |
|  |  |  |  |  |  |  |  | 0.86 (0.52-1.42)b |  |
| *BRCA1* | rs1799966; Ser1613Gly | Sturgis et al.,2005(8) | 134 | 165 | Ca | 0.77 (0.54-1. 09) | LD with rs799917 | 0.93 (0.58-1.51)a | LD with rs799917 |
|  |  |  |  |  |  |  |  | 0.45 (0.19-1.08)b |  |
|  |  | Xu et al.,2012(9) | 303 | 511 | Mi | 0.90 (0.72-1.11) |  | 0.79 (0.59-1.07)a |  |
|  |  |  |  |  |  |  |  | 0.93 (0.56-1.53)b |  |
| *BRCA1* | 1988A>G | Xu et al.,2012(9) | 303 | 511 | Mi | 0.86 (0.69-1.07) |  | **0.66 (0.49-0.90)a** |  |
|  |  |  |  |  |  |  |  | 0.98 (0.62-1.56)b |  |
| *BRCA1* | rs1799950; Gln315Arg | Xu et al.,2012(9) | 303 | 511 | Mi | 1.35 (0.90-2.03) |  | 1.11 (0.71-1.74)a |  |
|  |  |  |  |  |  |  |  | - |  |
| *BRCA1* | rs1060915; Ser1436Ser | Xu et al.,2012(9) | 303 | 511 | Mi | 0.94 (0.76-1.15) | LD with rs799917 | 0.76 (0.55-1.04)a | LD with rs799917 |
|  |  |  |  |  |  |  |  | 0.97 (0.63-1.49)b |  |
| *BRCA2* | rs144848; Asn372His | Sturgis et al.,2005(8) | 129 | 165 | Ca | 0.87 (0.59-1.26) |  | 0.79 (0.50-1.27)a |  |
|  |  |  |  |  |  |  |  | 0.92 (0.24-3.57)b |  |
|  |  | Sigurdson et al.,2009(4) | 975 | 901 | Ca | 1.12 (0.96-1.30) |  | 1.12 (0.92-1.36)a |  |
|  |  |  |  |  |  |  |  | 1.24 (0.83-1.87)b |  |
| *BRCA2* | rs1799944; Asn991Asp | Sturgis et al.,2005(8) | 127 | 165 | Ca | 1.43 (0.64-3.19) |  | 1.45 (0.64-3.31)a |  |
|  |  |  |  |  |  |  |  | - |  |
| *BRIP1* | rs2048718; -1918G>A | Sigurdson et al.,2009(4) | 877 | 903 | Ca | 0.94 (0.82-1.08) | 1.12 (0.93-1.34) | **0.75 (0.57-0.98)a** | 1.13 (0.86-1.48)a |
|  |  |  |  |  |  |  |  | 0.82 (0.62-1.08)b | 1.24 (0.86-1.77)b |
| *BRIP1* | rs4986764; Ser919Pro | Sigurdson et al.,2009(4) | 816 | 855 | Ca | 1.03 (0.90-1.18) | 0.91 (0.79-1.13) | 0.93 (0.75-1.15)a | 0.82 (0.63-1.07)a |
|  |  |  |  |  |  |  |  | 1.11 (0.83-1.47)b | 0.97 (0.67-1.42)b |
| *CHEK2* | 1100delC | Sigurdson et al.,2009(4) | 807 | 834 | Ca | 0.52 (0.09-2.82) |  | 0.52 (0.09-2.82)a |  |
|  |  |  |  |  |  |  |  | - |  |
| *ERCC2* | rs1799793; Asp312Asn | Silva et al.,2005(10) | 108 | 213 | Ca | 1.35 (0.96-1.91) |  | 1.16 (0.70-1.91)a |  |
|  |  |  |  |  |  |  |  | 2.05 (0.98-4.30)b |  |
| *ERCC2* | rs13181; Lys751Gln | Silva et al.,2005(10) | 108 | 213 | Ca | 1.29 (0.92-1.81) | 0.92 (0.77-1.10) | 1.21 (0.73-2.02)a | 0.88 (0.67-1.16)a |
|  |  |  |  |  |  |  |  | 1.66 (0.84-3.29)b | 0.86 (0.31-1.21)b |
| *HUS1* | rs2708906 | Neta et al.,2011(3) | 344 | 452 | Ca | - | 1.11 (0.93-1.32) | **1.55 (1.11-2.18)a** | 1.21 (0.91-1.61)a |
|  |  |  |  |  |  |  |  | **2.40 (1.51-3.82)b** | 1.20 (0.92-1.57)b |
| *MGMT* | rs4751109 | Neta et al.,2011(3) | 344 | 452 | Ca | - |  | **1.66 (1.15-2.39)a** |  |
|  |  |  |  |  |  |  |  | **2.50 (1.24-5.03)b** |  |
| *MTF1* | rs11488567; 2193T>A | Akulevich et al.,2009(5) | 253 | 595 | Ca | 0.94 (0.76-1.16) | 0.91 (0.76-1.08) | 1.13 (0.82-1.57)a | 0.85 (0.65-1.13)a |
|  |  |  |  |  |  |  |  | 0.79 (0.77-1.42)b | 0.84 (0.65-1.10) |
| *MTF1* | rs3912368; 20433G>A | Akulevich et al.,2009(5) | 255 | 596 | Ca | 0.89 (0.71-1.11) | 1.08 (0.90-1.30) | 1.04 (0.77-1.42)a | 0.96 (0.73-1.24)a |
|  |  |  |  |  |  |  |  | 0.63 (0.36-1.11)b | 1.27 (0.87-1.85)b |
| *MUTYH* | rs3219489; Gln335His | Santos et al.,2012(1) | 78 | 216 | Ca | 0.79 (0.54-1.16) |  | 0.65 (0.40-1.05)a |  |
|  |  |  |  |  |  |  |  | 1.04 (0.33-3.30)b |  |
| *LIG4* | rs1805388; Thr9Ile | Gomes et al.,2010(11) | 109 | 217 | Ca | 1.22 (0.88-1.70) | 0.80 (0.61-1.05) | 1.28 (0.76-2.18)a | 0.85 (0.65-1.15)a |
|  |  |  |  |  |  |  |  | 1.49 (0.74-2.98)b | 0.42 (0.15-1.20)b |
| *Ku80* | Ex21-238G>A | Gomes et al.,2010(11) | 77 | 216 | Ca | 1.22 (0.88-1.70) |  | 1.28 (0.76-2.18)a |  |
|  |  |  |  |  |  |  |  | 1.49 (0.74-2.98)b |  |
| *Ku80* | Ex21+338T>C | Gomes et al.,2010(11) | 109 | 216 | Ca | 1.17 (0.72-1.91) |  | 1.28 (0.74-2.21)a |  |
|  |  |  |  |  |  |  |  | 0.70 (0.07-6.79)b |  |
| *Ku80* | Ex21-352C>A | Gomes et al.,2010(11) | 107 | 216 | Ca | 1.15 (0.70-1.89) |  | 1.25 (0.72-2.17)a |  |
|  |  |  |  |  |  |  |  | 0.70 (0.07-6.88)b |  |
| *Ku80* | Ex21+466A>G | Gomes et al.,2010(11) | 109 | 216 | Ca | 0.79 (0.46-1.37) |  | 0.70 (0.37-1.30)a |  |
|  |  |  |  |  |  |  |  | 1.25 (0.20-7.59)b |  |
| *NBS1* | rs1805794; Glu185Gln | Bastos et al.,2009(12) | 109 | 217 | Ca | 0.95 (0.66-1.36) | 1.11 (0.92-1.35) | 1.07 (0.66-1.75)a | **1.33 (1.03-1.73)a** |
|  |  |  |  |  |  |  |  | 0.78 (0.34-1.80)b | 1.00 (0.65-1.53)b |
| *OGG1* | rs1052133; Ser326Cys | García-Qu. et al.,2011(13) | 397 | 467 | Ca | 1.00 (0.79-1.26) | 0.87 (0.70-1.08) | 0.94 (0.71-1.26)a | 0.93 (0.72-1.21)a |
|  |  |  |  |  |  |  |  | 1.16 (0.60-2.24)b | 0.61 (0.33-1.13)b |
|  |  | Santos et al.,2012(1) | 108 | 217 | Ca | 0.82 (0.53-1.28) |  | 0.78 (0.48-1.29)a |  |
|  |  |  |  |  |  |  |  | - |  |
| *RAD18* | rs373572; Arg302Gln | Sigurdson et al.,2009(4) | 859 | 887 | Ca | 0.97 (0.84-1.11) | 1.08 (0.88-1.34) | 1.02 (0.83-1.25)a | 1.06 (0.82-1.37)a |
|  |  |  |  |  |  |  |  | 0.92 (0.70-1.20)b | 1.25 (0.71-2.17)b |
| *RAD51* | rs1801320; 135G>C | Sturgis et al.,2005(8) | 129 | 166 | Ca | 1.12 (0.59-2.12) |  | 1.13 (0.58-2.19)a |  |
|  |  |  |  |  |  |  |  | - |  |
| *RAD51* | rs1801321; Ex1-59G>T | Bastos et al.,2009(12) | 109 | 217 | Ca | **1.41 (1.02-1.95)** | 0.86 (0.72-1.03) | 1.41 (0.82-2.45)a | 0.84 (0.64-1.11)a |
|  |  |  |  |  |  |  |  | **1.89 (1.00-3.58)b** | 0.73 (0.51-1.05)b |
| *RAD51C* | rs304267; 15452658T>C | Siraj et al.,2008(14) | 50 | 215 | Ca | 0.78 (0.49-1.23) | **1.19 (1.00-1.42)** | 0.89 (0.46-1.72)a | 1.13 (0.86-1.49)a |
|  |  |  |  |  |  |  |  | 0.54 (0.19-1.54)b | **1.47 (1.02-2.13)b** |
| *RAD51C* | rs304270; 15455419A>G | Siraj et al.,2008(14) | 159 | 199 | Ca | 1.06 (0.78-1.45) | 0.91 (0.76-1.10) | 0.97 (0.63-1.51)a | 0.99 (0.76-1.29)a |
|  |  |  |  |  |  |  |  | 1.27 (0.61-2.62)b | 0.78 (0.52-1.15)b |
| *RAD52* | 38207T>C | Sturgis et al.,2005(8) | 116 | 165 | Ca | 0.90 (0.63-1.28) |  | 0.97 (0.58-1.60)a |  |
|  |  |  |  |  |  |  |  | 0.56 (0.18-1.71)b |  |
| *RAD52* | rs11226; *744C>T | Siraj et al.,2008(14) | 210 | 228 | Ca | **2.07 (1.51-2.84)** | 0.92 (0.76-1.10) | **1.53 (1.03-2.28)a** | 0.82 (0.63-1.06)a |
|  |  |  |  |  |  |  |  | **-** | 0.93 (0.62-1.38)b |
| *RAD52* | rs4987206; Gln221Glu | Siraj et al.,2008(14) | 210 | 217 | Ca | **16.3 (7.01-37.7)** |  | **15.6 (6.56-36.9)a** |  |
|  |  |  |  |  |  |  |  | **-** |  |
| *XRCC1* | rs1799782; Arg194Trp | Ho et al.,2009(15) | 251 | 503 | Ca | **1.49 (1.02-2.17)** | 1.08 (0.78-1.50) | 1.39 (0.92-2.10)a | 1.02 (0.73-1.44)a |
|  |  |  |  |  |  |  |  | - | 2.00 (0.40-9.98)b |
|  |  | Sigurdson et al.,2009(4) | 876 | 906 | Ca | **0.80 (0.66-0.97)** |  | 0.88 (0.71-1.11)a |  |
|  |  |  |  |  |  |  |  | **0.46 (0.25-0.86)b** |  |
|  |  | Fard-Esf. et al.,2011(16) | 157 | 187 | Ca | 1.32 (0.73-2.41) |  | 1.10 (0.56-2.16)a |  |
|  |  |  |  |  |  |  |  | 3.66 (0.38-35.6)b |  |
|  |  | Santos et al.,2012(1) | 77 | 217 | Ca | 1.16 (0.56-2.40) |  | 0.76 (0.33-1.78)a |  |
|  |  |  |  |  |  |  |  | - |  |
|  |  | Chiang et al.,2008(2) | 283 | 469 | As | **1.27 (1.02-1.59)** |  | 1.10 (0.81-1.51)a |  |
|  |  |  |  |  |  |  |  | **1.89 (1.14-3.15)b** |  |
|  |  | Ryu et al.,2011(17) | 111 | 100 | AS | **0.61 (0.40-0.91)** |  | **0.55 (0.31-0.98)a** |  |
|  |  |  |  |  |  |  |  | 0.40 (0.16-1.03)b |  |
|  | **Meta-analyses from:** | Qian et al.,2012(18) | 433 | 1596 | Ca | - |  | 1.30 (0.92-1.85)a |  |
|  |  |  |  |  |  |  |  | 4.84 (0.97-24.2)b |  |
|  |  | Bao et al.,2013(19) | 262 | 404 | Ca | 1.27 (0.80-2.02) |  | 0.96 (0.57-1.63)a |  |
|  |  |  |  |  |  |  |  | 5.43 (0.90-32.8)b |  |
|  |  | Hu et al.,2013(20) | 446 | 1602 | Ca | 1.44 (1.05-1.98) |  | 1.30 (0.92-1.85)a |  |
|  |  |  |  |  |  |  |  | 1.71 (0.38-8.43)b |  |
| *XRCC1* | rs25489; Arg280His | Siraj et al.,2008(14) | 50 | 229 | Ca | 0.79 (0.47-1.32) | 0.83 (0.60-1.15) | 0.59 (0.29-1.22)a | 0.85 (0.61-1.20)a |
|  |  |  |  |  |  |  |  | 0.93 (0.33-2.65)b | 0.43 (0.07-2.59)b |
|  |  | Ho et al.,2009(15) | 251 | 503 | Ca | 0.88 (0.53-1.46) |  | 0.87 (0.51-1.47)a |  |
|  |  |  |  |  |  |  |  | - |  |
|  |  | Akulevich et al.,2009(5) | 255 | 593 | Ca | 1.15 (0.70-1.87) |  | 1.16 (0.70-1.91)a |  |
|  |  |  |  |  |  |  |  | - |  |
|  |  | García-Qu. et al.,2011(13) | 398 | 473 | Ca | **1.57 (1.07-2.30)** |  | **1.67 (1.10-2.53)a** |  |
|  |  |  |  |  |  |  |  | 1.26 (0.25-6.30)b |  |
|  |  | Fard-Esf. et al.,2011(16) | 170 | 193 | Ca | 1.31 (0.73-2.38) |  | 1.51 (0.79-2.92)a |  |
|  |  |  |  |  |  |  |  | 0.59 (0.05-6.60)b |  |
|  |  | Chiang et al.,2008(2) | 283 | 469 | As | 0.81 (0.59-1.12) |  | 0.74 (0.52-1.07)a |  |
|  |  |  |  |  |  |  |  | 1.11 (0.35-3.59)b |  |
|  | **Meta-analyses from:** | Qian et al.,2012(18) | 1149 | 2887 | Ca | - |  | 1.18 (0.93-1.49)a |  |
|  |  |  |  |  |  |  |  | 0.95 (0.42-2.16)b |  |
|  |  | Bao et al.,2013(19) | 823 | 1259 | Ca | **1.38 (1.05-1.80)** |  | **1.45 (1.09-1.93)a** |  |
|  |  |  |  |  |  |  |  | 0.99 (0.26-3.70)b |  |
|  |  | Hu et al.,2013(20) | 1153 | 2898 | Ca | 1.15 (0.93-1.42) |  | 1.18 (0.93-1.49)a |  |
|  |  |  |  |  |  |  |  | 0.95 (0.42-2.16)b |  |
| *XRCC1* | rs25487; Arg399Gln | Siraj et al.,2008(14) | 50 | 229 | Ca | 0.72 (0.41-1.26) | 0.87 (0.72-1.05) |  | **0.76 (0.59-0.99)a** |
|  |  |  |  |  |  |  |  |  | 0.87 (0.58-1.34)b |
|  |  | Ho et al.,2009(15) | 251 | 503 | Ca | **0.70 (0.56-0.89)** |  |  | 0.76 (0.55-1.05)a |
|  |  |  |  |  |  |  |  |  | **0.47 (0.27-0.82)b** |
|  |  | Sigurdson et al.,2009(4) | 857 | 892 | Ca | 1.05 (0.91-1.21) |  |  | 1.18 (0.97-1.44)a |
|  |  |  |  |  |  |  |  |  | 0.95 (0.68-1.32)b |
|  |  | Akulevich et al.,2009(5) | 255 | 595 | Ca | 0.86 (0.69-1.07) |  | **0.68 (0.50-0.94)a** |  |
|  |  |  |  |  |  |  |  | 0.90 (0.56-1.45)b |  |
|  |  | García-Qu. et al.,2011(13) | 386 | 474 | Ca | 1.00 (0.82-1.22) |  | 1.12 (0.84-1.50)a |  |
|  |  |  |  |  |  |  |  | 0.91 (0.59-1.40)b |  |
|  |  | Fard-Esf. et al.,2011(16) | 155 | 190 | Ca | 0.87 (0.63-1.20) |  | 0.73 (0.47-1.15)a |  |
|  |  |  |  |  |  |  |  | 0.90 (0.44-1.85)b |  |
|  |  | Santos et al.,2012(1) | 78 | 217 | Ca | 0.96 (0.69-1.35) |  | 0.90 (0.55-1.47)a |  |
|  |  |  |  |  |  |  |  | 0.98 (0.46-2.10)b |  |
|  |  | Chiang et al.,2008(2) | 283 | 469 | As | 1.25 (0.98-1.59) |  | 1.23 (0.90-1.68)a |  |
|  |  |  |  |  |  |  |  | 1.57 (0.87-2.84)b |  |
|  |  | Ryu et al.,2011(17) | 111 | 100 | As | 0.72 (0.43-1.20) |  | 0.74 (0.36-1.53)a |  |
|  |  |  |  |  |  |  |  | 0.64 (0.23-1.81)b |  |
|  | **Meta-analyses from:** | Qian et al.,2012(18) | 1121 | 2883 | Ca | - |  | **0.84 (0.72-0.98)a** |  |
|  |  |  |  |  |  |  |  | 0.81 (0.63-1.04)b |  |
|  |  | Bao et al.,2013(19) | 902 | 1476 | Ca | 0.92 (0.82-1.05) |  | 0.87 (0.73-1.04)a |  |
|  |  |  |  |  |  |  |  | 0.90 (0.69-1.19)b |  |
|  |  | Hu et al.,2013(20) | 1875 | 5766 | Ca | **0.86 (0.77-0.96)** |  | **0.84 (0.71-0.98)a** |  |
|  |  |  |  |  |  |  |  | **0.77 (0.60-0.99)b** |  |
| *XRCC1* | rs2682585; 310C>T | Ho et al.,2009(15) | 251 | 503 | Ca | 1.12 (0.86-1.45) | 0.93 (0.74-1.17) | 1.15 (0.83-1.58)a | 0.92 (0.70-1.20)a |
|  |  |  |  |  |  |  |  | 1.17 (0.53-2.60)b | 0.89 (0.43-1.85)b |
| *XRCC1* | 539..542 delG | Ho et al.,2009(15) | 251 | 503 | Ca | 0.88 (0.70-1.10) |  | 0.73 (0.53-1.02)a |  |
|  |  |  |  |  |  |  |  | 0.88 (0.55-1.39)b |  |
| *XRCC1* | rs3213245; 1915T>C | Ho et al.,2009(15) | 251 | 503 | Ca | 0.91 (0.73-1.13) | 1.10 (0.92-1.32) | 0.81 (0.58-1.13)a | 1.02 (0.78-1.34)a |
|  |  |  |  |  |  |  |  | 0.87 (0.56-1.35)b | 1.24 (0.87-1.79)b |
| *XRCC2* | rs3218536; Arg188His | Bastos et al.,2009(12) | 78 | 217 | Ca | 0.76 (0.40-1.44) |  | 0.74 (0.38-1.44)a |  |
|  |  |  |  |  |  |  |  | - |  |
|  |  | García-Qu. et al.,2011(13) | 397 | 477 | Ca | 1.08 (0.69-1.26) |  | 0.88 (0.21-3.63)a |  |
|  |  |  |  |  |  |  |  | 0.82 (0.20-3.30)b |  |
| *XRCC3* | rs861539; Thr241Met | Sturgis et al.,2005(8) | 134 | 161 | Ca | **1.61 (1.15-2.27)** | 1.09 (0.91-1.30) | **2.12 (1.29-3.50)a** | 1.16 (0.88-1.52)a |
|  |  |  |  |  |  |  |  | 2.05 (0.99-4.27)b | 1.16 (0.81-1.66)b |
|  |  | Siraj et al.,2008(14) | 37 | 227 | Ca | 1.05 (0.62-1.75) |  | 0.62 (0.28-1.35)a |  |
|  |  |  |  |  |  |  |  | 1.51 (0.57-4.01)b |  |
|  |  | Akulevich et al.,2009(5) | 252 | 596 | Ca | 0.94 (0.75-1.16) |  | 0.93 (0.68-1.27)a |  |
|  |  |  |  |  |  |  |  | 0.88 (0.54-1.43)b |  |
|  |  | Bastos et al.,2009(12) | 78 | 214 | Ca | 1.17 (0.84-1.63) |  | 0.70 (0.42-1.19)a |  |
|  |  |  |  |  |  |  |  | 1.63 (0.85-3.15)b |  |
| *XRCC3* | rs1799796; ISV7-14A>G | García-Qu. et al.,2011(13) | 398 | 478 | Ca | 0.85 (0.68-1.06) | 0.86 (0.70-1.06) | 0.92 (0.69-1.21)a | 0.80 (0.62-1.03)a |
|  |  |  |  |  |  |  |  | 0.60 (0.33-1.11)b | 0.87 (0.51-1.48)b |
| *XRCC4* | 894-7G>A | Siraj et al.,2008(14) | 192 | 227 | Ca | 0.84 (0.61-1.16) |  | 0.73 (0.49-1.11)a |  |
|  |  |  |  |  |  |  |  | 0.97 (0.41-2.28)b |  |
| *XRCC4* | rs1805377; Asn298Ser | Gomes et al.,2010(11) | 109 | 217 | Ca | **0.56 (0.32-0.99)** | 1.01 (0.76-1.34) | 0.60 (0.32-1.13)a | 0.99 (0.72-1.35)a |
|  |  |  |  |  |  |  |  | 0.30 (0.04-2.51)b | 1.14 (0.44-2.92)b |
| *XRCC4* | rs28360135; Thr134Ile | Gomes et al.,2010(11) | 109 | 216 | Ca | 1.24 (0.61-2.53) |  | 1.26 (0.60-2.62)a |  |
|  |  |  |  |  |  |  |  | - |  |
| *XRCC7* | rs7003908; 6721T>G | Sturgis et al.,2005(8) | 134 | 166 | Ca | 1.06 (0.76-1.48) | 1.11 (0.93-1.33) | 1.22 (0.75-2.00)a | 1.28 (0.97-1.68)a |
|  |  |  |  |  |  |  |  | 1.01 (0.49-2.09)b | 1.17 (0.83-1.66)b |
| *XRCC7* | rs7830743; Ile3434Thr | Siraj et al.,2008(14) | 206 | 229 | Ca | 0.99 (0.65-1.49) | 1.07 (0.78-1.47) | 0.96 (0.60-1.54)a | 1.07 (0.77-1.50)a |
|  |  |  |  |  |  |  |  | 1.11 (0.27-4.49)b | 1.12 (0.27-4.72)b |
|  |  | Rahimi et al.,2012(21) | 173 | 204 | Ca | **1.90 (1.29-2.79)** |  | **2.42 (1.55-3.81)a** |  |
|  |  |  |  |  |  |  |  | 1.16 (0.25-5.29)b |  |
| *ZNF350* | rs2278420; Leu66Pro | Sigurdson et al.,2009(4) | 877 | 911 | Ca | 0.99 (0.84-1.16) | 0.85 (0.67-1.09) | 1.05 (0.86-1.28)a | 0.86 (0.65-1.13)a |
|  |  |  |  |  |  |  |  | 0.83 (0.53-1.32)b | 0.70 (0.29-1.66)b |
| *ZNF350* | rs4986771; Ser472Pro | Sigurdson et al.,2009(4) | 862 | 896 | Ca | 1.01 (0.63-1.62) |  | 1.01 (0.63-1.63)a |  |
|  |  |  |  |  |  |  |  | - |  |
| *ZNF350* | rs2278415; Arg501Ser | Sigurdson et al.,2009(4) | 847 | 871 | Ca | 1.07 (0.89-1.28) | 0.81 (0.63-1.05) | 1.08 (0.88-1.32)a | 0.81 (0.61-1.08)a |
|  |  |  |  |  |  |  |  | - | 0.63 (0.23-1.68)b |
| **Cell-cycle regulation and apoptosis** | | | | | | | | | |
| *BAK1* | rs493871 | Neta et al.,2011(3) | 344 | 452 | Ca | - | 0.92 (0.77-1.10) | 1.41 (0.98-2.04)a | 0.94 (0.72-1.23)a |
|  |  |  |  |  |  |  |  | **2.29 (1.49-3.50)b** | 0.83 (0.58-1.21)b |
| *BCL2* | rs1801018; Thr7Thr | Eun et al.,2011(22) | 92 | 222 | As | 0.58 (0.32-1.08) | 1.00 (0.84-1.20) | 0.53 (0.27-1.05)a | 1.13 (0.86-1.49)a |
|  |  |  |  |  |  |  |  | 0.72 (0.07-7.00)b | 0.96 (0.67-1.37)b |
| *BCL2* | rs2279115; -938A>C | Eun et al.,2011(22) | 92 | 222 | As | 0.88 (0.62-1.26) | 0.97 (0.82-1.16) | 0.68 (0.40-1.16)a | 1.01 (0.76-1.33)a |
|  |  |  |  |  |  |  |  | 0.91 (0.44-1.87)b | 0.94 (0.66-1.34)b |
|  |  | Wang et al.,2012(23) | 92 | 102 | As | **1.55 (1.12-2.16)** |  | 1.38 (0.84-2.26)a |  |
|  |  |  |  |  |  |  |  | **2.80 (1.36-5.76)b** |  |
| *BIRC5* | rs9904341; -31G>C | Yazdani et al.,2012(24) | 123 | 131 | Ca | **1.76 (1.21-2.57)** |  | 1.51 (0.89-2.55)a |  |
|  |  |  |  |  |  |  |  | **3.96 (1.54-10.1)b** |  |
| *BIRC5* | rs2071214; Glu129Lys | Wang et al.,2013(25) | 122 | 193 | As | **0.57 (0.39-0.83)** |  | **0.55 (0.33-0.92)a** |  |
|  |  |  |  |  |  |  |  | **0.44 (0.20-0.97)b** |  |
| *CASP8* | -652 6N ins/del | Wang et al.,2012(23) | 118 | 213 | As | 1.15 (0.80-1.65) |  | 0.92 (0.36-2.32)a |  |
|  |  |  |  |  |  |  |  | 1.15 (0.46-2.86)b |  |
| *CASP9* | -1263A>G | Wang et al.,2012(23) | 118 | 213 | AS | 1.32 (0.96-1.83) |  | **2.27 (1.17-4.38)a** |  |
|  |  |  |  |  |  |  |  | **2.02 (1.01-4.04)b** |  |
| *CDKN1B* | rs34330; -79C>T | Landa et al.,2010(26) | 328 | 385 | Ca | - | 0.93 (0.75-1.16) | 0.96 (0.70-1.32)a | 0.88 (0.68-1.14)a |
|  |  |  |  |  |  |  |  | 1.44 (0.81-2.56)b | 1.06 (0.55-2.05)b |
| *CDKN2A* | rs3731249; Ala148Thr | Debniak et al.,2006(27) | 173 | 223 |  | 0.55 (0.14-2.14) | 1.16 (0.77-1.75) | 0.55 (0.14-2.14)a | 1.00 (0.66-1.51)b |
|  |  |  |  |  |  |  |  | - | - |
| *CDKN2C* | rs11587909; -361G>A | Neta et al.,2011(3) | 344 | 452 | Ca | **-** |  | **1.36 (0.99-1.88)a** |  |
|  |  |  |  |  |  |  |  | **2.44 (1.46-4.08)b** |  |
| *FAS* | rs2234767; 37G>A | Ho et al.,2008(28) | 279 | 510 | Mi | 1.08 (0.79-1.47) | 1.12 (0.84-1.49) | 1.16 (0.81-1.67)a | 1.22 (0.90-1.66)a |
|  |  |  |  |  |  |  |  | 0.75 (0.23-2.42)b | 0.55 (0.15-2.06)b |
| *FAS* | rs2234768; 744A>G | Ho et al.,2008(28) | 279 | 510 | Mi | 1.14 (0.93-1.40) |  | 1.28 (0.90-1.82)a |  |
|  |  |  |  |  |  |  |  | 1.29 (0.85-1.96)b |  |
| *FAS* | rs2229521; Thr74Thr | Ho et al.,2008(28) | 279 | 510 | Mi | 1.35 (0.90-2.01) |  | 1.18 (0.76-1.82)a |  |
|  |  |  |  |  |  |  |  | - |  |
| *FAS* | rs2234978; Thr193Thr | Ho et al.,2008(28) | 279 | 510 | MI | 1.00 (0.79-1.27) | 0.88 (0.73-1.06) | 1.00 (0.74-1.36)a | 0.85 (0.66-1.10)a |
|  |  |  |  |  |  |  |  | 1.00 (0.54-1.87)b | 0.78 (0.50-1.23)b |
| *TGFB1* | rs1800472; Thr263Ile | Sigurdson et al.,2009(4) | 877 | 914 | Ca | **0.67 (0.49-0.90)** | 1.17 (0.82-1.68) | **0.50 (0.30-0.84)a** | 1.05 (0.73-1.51)a |
|  |  |  |  |  |  |  |  | 0.76 (0.45-1.26)b | - |
| *TP53* | rs1042522; Pro72Arg | Rogounovitch et al.,2006(29) | 68 | 313 | Ca | 0.81 (0.51-1.32) | 0.93 (0.76-1.14) | 0.71 (0.38-1.33)a | 1.01 (0.78-1.31)a |
|  |  |  |  |  |  |  |  | 0.86 (0.28-2.64)b | 0.77 (0.47-1.25)b |
|  |  | Siraj et al.,2008(14) | 46 | 225 | Ca | 0.91 (0.58-1.42) |  | 0.72 (0.33-1.58)a |  |
|  |  |  |  |  |  |  |  | 0.82 (0.36-1.90)b |  |
|  |  | Akulevich et al.,2009(5) | 251 | 592 | Ca | 1.13 (0.90-1.43) |  | 1.16 (0.85-1.58)a |  |
|  |  |  |  |  |  |  |  | 1.25 (0.73-2.14)b |  |
|  |  | Granja et al.,2004(30) | 98 | 153 | Mi | 1.14 (0.78-1.65) |  | 0.68 (0.40-1.18)a |  |
|  |  |  |  |  |  |  |  | **5.51 (1.45-20.9)b** |  |
|  |  | Reis et al.,2010(31) | 35 | 134 | Mi | **2.89 (1.68-4.95)** |  | **6.91 (2.58-18.5)a** |  |
|  |  |  |  |  |  |  |  | **5.70 (1.76-18.5)b** |  |
| *WDR3* | rs4233455 | Akdi et al.,2010(32) | 152 | 113 | Ca | 1.23 (0.84-1.74) | **0.83 (0.70-1.00)** | 1.01 (0.57-1.80)a | **0.65 (0.49-0.86)a** |
|  |  |  |  |  |  |  |  | 1.54 (0.77-3.08)b | 0.74 (0.52-1.06)b |
| *WDR3* | rs2208375 | Akdi et al.,2010(32) | 152 | 114 | Ca | 1.17 (0.83-1.65) | LD with rs4233455 | 1.01 (0.56-1.82)a | LD with rs4233455 |
|  |  |  |  |  |  |  |  | 1.37 (0.69-2.72)b |  |
| *WDR3* | rs3754127 | Akdi et al.,2010(32) | 150 | 118 | Ca | 1.07 (0.76-1.51) | LD with rs4233455 | 0.79 (0.45-1.37)a | LD with rs4233455 |
|  |  |  |  |  |  |  |  | 1.24 (0.61-2.51)b |  |
| *WDR3* | rs1321665 | Akdi et al.,2010(32) | 145 | 114 | Ca | 1.25 (0.88-1.77) | LD with rs4233455 | 0.98 (0.55-1.76)a | LD with rs4233455 |
|  |  |  |  |  |  |  |  | 1.61 (0.80-3.27)b |  |
| *WDR3* | rs6680844 | Akdi et al.,2010(32) | 149 | 114 | Ca | 1.25 (0.89-1.77) | LD with rs4233455 | 0.94 (0.53-1.67)a | LD with rs4233455 |
|  |  |  |  |  |  |  |  | 1.61 (0.80-3.24)b |  |
| *WDR3* | rs3765501 | Akdi et al.,2010(32) | 155 | 116 | Ca | 1.19 (0.85-1.67) | LD with rs4233455 | 0.98 (0.55-1.73)a | LD with rs4233455 |
|  |  |  |  |  |  |  |  | 1.44 (0.72-2.85)b |  |
| *WDR3* | rs1321666 | Akdi et al.,2010(32) | 147 | 114 | Ca | 1.20 (0.85-1.69) | LD with rs4233455 | 0.95 (0.53-1.70)a | LD with rs4233455 |
|  |  |  |  |  |  |  |  | 1.46 (0.73-2.94)b |  |
| *WDR3* | rs4658973 | Baida et al.,2008(33) | 214 | 145 | Ca | **0.35 (0.25-0.47)** | LD with rs4233455 | **0.40 (0.26-0.62)a** | LD with rs4233455 |
|  |  |  |  |  |  |  |  | **0.07 (0.03-0.18)b** |  |
|  |  | Akdi et al.,2010(32) | 145 | 114 | Ca | 1.09 (0.77-1.55) |  | 0.81 (0.46-1.41)a |  |
|  |  |  |  |  |  |  |  | 1.29 (0.63-2.64)b |  |
| *WDR3* | rs6685906 | Akdi et al.,2010(32) | 152 | 113 | Ca | 1.25 (0.88-1.76) | LD with rs4233455 | 1.00 (0.56-1.77)a | LD with rs4233455 |
|  |  |  |  |  |  |  |  | 1.58 (0.79-3.15)b |  |
| *WDR3* | rs6678671 | Akdi et al.,2010(32) | 153 | 116 | Ca | 1.22 (0.87-1.72) | LD with rs4233455 | 0.98 (0.55-1.74)a | LD with rs4233455 |
|  |  |  |  |  |  |  |  | 1.51 (0.76-2.99)b |  |
| *XAF1* | rs2271232; Arg132His | Kim et al.,2013(34) | 89 | 276 | As | 1.39 (0.77-2.52) |  | 0.94 (0.46-1.94)a |  |
|  |  |  |  |  |  |  |  | - |  |
| *XAF1* | rs34195599; Glu85Gly | Kim et al.,2013(34) | 89 | 276 | As | 3.17 (1.01-9.97) |  | 3.25 (1.02-10.4)a |  |
|  |  |  |  |  |  |  |  | - |  |
| **Xenobiotic metabolism** | | | | | | | | | |
| *CYP1A1* | rs4646903; 3801T>C_m1 | Siraj et al.,2008(35) | 47 | 509 | Ca | 1.42 (0.88-2.30) | 1.28 (0.95-1.73) | 1.16 (0.60-2.24)a | 1.32 (0.96-1.80)a |
|  |  |  |  |  |  |  |  | 2.42 (0.86-6.83)b | 1.40 (0.26-7.70)b |
|  |  | Reis et al.,2010(31) | 35 | 134 | Mi | 1.08 (0.61-1.90) |  | 0.92 (0.42-2.04)a |  |
|  |  |  |  |  |  |  |  | 1.39 (0.39-4.92)b |  |
| *CYP1A1* | rs1048943; Ile462Val_m2 | Reis et al.,2010(31) | 35 | 134 | Mi | 0.97 (0.51-1.83) |  | 0.64 (0.27-1.49)a |  |
|  |  |  |  |  |  |  |  | 2.09 (0.46-9.40)b |  |
| *CYP1A1* | rs1799814; 4887C>A_m4 | Siraj et al.,2008(35) | 202 | 511 | Ca | **1.87 (1.44-2.42)** | **1.85 (1.27-2.70)** | **1.91 (1.36-2.70)a** | **1.77 (1.20-2.60)a** |
|  |  |  |  |  |  |  |  | **3.48 (1.74-6.96)b** | **5.03 (0.62-41.1)b** |
| *CYP2D6* | rs3892097; CYP2D6*4 | Lemos et al.,2007(36) | 187 | 256 | Ca | **0.56 (0.39-0.80)** |  | **0.60 (0.39-0.93)a** |  |
|  |  |  |  |  |  |  |  | **0.24 (0.01-0.86)b** |  |
| *CYP19A1* | rs4774585 | Schonfeld et al.,2012(37) | 344 | 452 | Ca | **1.49 (1.16-1.90)** | 0.96 (0.77-1.20) | **1.55 (1.14-2.09)a** | 0.97 (0.74-1.26)a |
|  |  |  |  |  |  |  |  | **2.04 (0.97-4.29)b** | 0.93 (0.51-1.71)b |
| *CYP19A1* | rs1004984 | Schonfeld et al.,2012(37) | 330 | 430 | Ca | **1.41 (1.14-1.74)** | 0.89 (0.74-1.06) | **1.37 (1.00-1.87)a** | 0.82 (0.62-1.08)a |
|  |  |  |  |  |  |  |  | **2.03 (1.29-3.20)b** | 0.81 (0.56-1.17)b |
| *CYP19A1* | rs7163193 | Schonfeld et al.,2012(37) | 274 | 523 | Ca | **1.84 (1.44-2.35)** | 0.99 (0.81-1.20) | **1.97 (1.44-2.71)a** | 1.00 (0.77-1.29)a |
|  |  |  |  |  |  |  |  | **2.67 (1.46-4.89)b** | 0.95 (0.59-1.53)b |
| *CYP19A1* | rs752760 | Schonfeld et al.,2012(37) | 343 | 452 | Ca | **1.37 (1.12-1.67)** |  | **1.46 (1.06-2.01)a** |  |
|  |  |  |  |  |  |  |  | **1.85 (1.22-2.81)b** |  |
| *CYP19A1* | rs2414099 | Schonfeld et al.,2012(37) | 273 | 421 | Ca | **1.47 (1.11-1.94)** | 0.84 (0.66-1.06) | **1.61 (1.15-2.24)a** | 0.91 (0.69-1.19)a |
|  |  |  |  |  |  |  |  | 1.60 (0.61-4.23)b | 0.52 (0.25-1.07)b |
| *CYP19A1* | rs1004982 | Schonfeld et al.,2012(37) | 344 | 452 | Ca | **1.37 (1.12-1.68)** | LD with rs1004984 | **1.39 (1.02-1.88)a** | LD with rs1004984 |
|  |  |  |  |  |  |  |  | **1.86 (1.20-2.89)b** |  |
| *CYP26B1* | rs12622950 | Asc.-Kilfoy et al.,2012(38) | NA | NA | Ca | - | 1.10 (0.88-1.38) | 1.32 (0.96-1.83)a | 1.04 (0.79-1.36)a |
|  |  |  |  |  |  |  |  | 1.69 (0.72-3.95)b | 1.41 (0.76-2.60)b |
| *CYP26B1* | rs6546742 | Asc.-Kilfoy et al.,2012(38) | NA | NA | Ca | - | 1.20 (0.98-1.48) | 0.65 (0.34-1.24)a | 1.16 (0.90-1.51)a |
|  |  |  |  |  |  |  |  | 0.57 (0.30-1.08)b | 1.50 (0.90-2.51)b |
| *CYP26B1* | rs7606254 | Asc.-Kilfoy et al.,2012(38) | NA | NA | Ca | - | 1.14 (0.89-1.46) | 1.07 (0.76-1.53)a | 1.11 (0.84-1.46)a |
|  |  |  |  |  |  |  |  | 2.07 (0.80-5.34)b | 1.57 (0.64-3.87)b |
| *CYP26B1* | rs887844 | Asc.-Kilfoy et al.,2012(38) | NA | NA | Ca | - |  | 1.12 (0.82-1.53)a |  |
|  |  |  |  |  |  |  |  | 1.49 (0.80-2.99)b |  |
| *CYP26B1* | rs887843 | Asc.-Kilfoy et al.,2012(38) | NA | NA | Ca | - |  | 1.12 (0.82-1.53)a |  |
|  |  |  |  |  |  |  |  | 1.55 (0.92-2.41)b |  |
| *CYP26B1* | rs707718 | Asc.-Kilfoy et al.,2012(38) | NA | NA | Ca | - | 0.99 (0.79-1.25) | 0.80 (0.57-1.13)a | 0.90 (0.69-1.17)a |
|  |  |  |  |  |  |  |  | 2.05 (0.86-4.91)b | 1.51 (0.68-3.35)b |
| *CYP26B1* | rs2241057 | Asc.-Kilfoy et al.,2012(38) | NA | NA | Ca | - | 1.12 (0.87-1.45) | 1.04 (0.74-1.45)a | 1.15 (0.86-1.53)a |
|  |  |  |  |  |  |  |  | 0.56 (0.19-1.64)b | 1.12 (0.46-2.72)b |
| *CYP26B1* | rs975612 | Asc.-Kilfoy et al.,2012(38) | NA | NA | Ca | - |  | 0.81 (0.51-1.28)a |  |
|  |  |  |  |  |  |  |  | 0.79 (0.49-1.27)b |  |
| *CYP26B1* | rs11681809 | Asc.-Kilfoy et al.,2012(38) | NA | NA | Ca | - |  | 0.92 (0.39-2.15)a |  |
|  |  |  |  |  |  |  |  | 1.13 (0.49-2.60)b |  |
| *CYP26B1* | rs194243 | Asc.-Kilfoy et al.,2012(38) | NA | NA | Ca | - |  | 0.99 (0.73-1.36)a |  |
|  |  |  |  |  |  |  |  | 1.24 (0.73-2.12)b |  |
| *CYP8B1* | rs6788947 | Asc.-Kilfoy et al.,2012(38) | NA | NA | Ca | **1.38 (1.13-1.68)** | 1.02 (0.86-1.22) | 1.24 (0.87-1.75)a | 1.22 (0.91-1.65)a |
|  |  |  |  |  |  |  |  | **1.88 (1.26-2.80)b** | 1.04 (0.74-1.46)b |
| *CYP8B1* | rs7614670 | Asc.-Kilfoy et al.,2012(38) | 342 | 450 | Ca | **0.75 (0.61-0.93)** | 1.04 (0.86-1.25) | **0.71 (0.52-0.95)a** | 1.14 (0.88-1.48)a |
|  |  |  |  |  |  |  |  | 0.62 (0.38-1.01)b | 0.99 (0.67-1.46)b |
| *CYP8B1* | rs11715464 | Asc.-Kilfoy et al.,2012(38) | 343 | 452 | Ca | **1.33 (1.09-1.63)** | 0.99 (0.83-1.19) | 1.31 (0.96-1.80)a | 1.08 (0.83-1.41)a |
|  |  |  |  |  |  |  |  | **1.79 (1.17-2.72)b** | 0.93 (0.64-1.35)b |
| *DHRS9* | rs16856430 | Asc.-Kilfoy et al.,2012(38) | 344 | 452 | Ca | 0.70 (0.55-0.92) |  | 0.68 (0.49-0.93)a |  |
|  |  |  |  |  |  |  |  | 0.60 (0.29-1.28)b |  |
| *FMO3* | rs10911641 | Asc.-Kilfoy et al.,2012(38) | 343 | 452 | Ca | **0.78 (0.61-0.99)** | 0.93 (0.76-1.14) | **0.74 (0.55-1.00)a** | 0.88 (0.68-1.14)a |
|  |  |  |  |  |  |  |  | **0.69 (0.55-0.98)b** | 0.96 (0.58-1.60)b |
| *GPX3* | rs3763013 | Lin et al.,2009(39) | 268 | 375 | As | 1.13 (0.88-1.45) |  | 1.17 (0.84-1.62)a |  |
|  |  |  |  |  |  |  |  | 1.19 (0.63-2.25)b |  |
| *GPX3* | rs3792796 | Lin et al.,2009(39) | 268 | 371 | As | 1.15 (0.90-1.46) | 1.08 (0.90-1.29) | 1.25 (0.90-1.74)a | 1.02 (0.78-1.33)a |
|  |  |  |  |  |  |  |  | 1.19 (0.66-2.16)b | 1.19 (0.83-1.72)b |
| *GPX3* | rs8177412 | Lin et al.,2009(39) | 268 | 377 | As | 1.23 (0.92-1.63) | 0.99 (0.77-1.28) | 1.35 (0.96-1.91)a | 1.03 (0.77-1.37)a |
|  |  |  |  |  |  |  |  | 1.07 (0.45-2.55)b | 0.85 (0.38-1.89)b |
| *GPX3* | rs3805435 | Lin et al.,2009(39) | 268 | 371 | As | 0.86 (0.69-1.08) | 1.24 (0.94-1.65) | 0.69 (0.47-1.00)a | 1.14 (0.84-1.54)a |
|  |  |  |  |  |  |  |  | 0.75 (0.48-1.18)b | 3.00 (0.85-10.6)b |
| *GPX3* | rs3828599 | Lin et al.,2009(39) | 368 | 374 | As | 0.86 (0.69-1.08) | 1.14 (0.94-1.39) | 0.69 (0.47-1.02)a | 1.18 (0.91-1.52)a |
|  |  |  |  |  |  |  |  | 0.75 (0.48-1.16)b | 1.24 (0.78-1.99)b |
| *GPX3* | rs2070593 | Lin et al.,2009(39) | 268 | 378 | As | 0.99 (0.78-1.25) | 1.04 (0.84-1.28) | 0.88 (0.63-1.22)a | 0.97 (0.74-1.25)a |
|  |  |  |  |  |  |  |  | 1.12 (0.65-1.92)b | 1.27 (0.73-2.20)b |
| *GSTM1* | GSTM1*0 | Canbay et al.,2003(40) | 19 | 25 | Ca | **-** |  | **-** |  |
|  |  |  |  |  |  |  |  | **4.79 (1.30-7.13)b** |  |
|  |  | Hernández et al.,2003(41) | 134 | 116 | Ca | - |  | - |  |
|  |  |  |  |  |  |  |  | 1.37 (0.83-2.26)b |  |
|  |  | Gaspar et al.,2004(42) | 103 | 204 | Ca | - |  | - |  |
|  |  |  |  |  |  |  |  | 1.18 (0.72-1.92)b |  |
|  |  | Lemos et al.,2008(43) | 188 | 247 | Ca | - |  | - |  |
|  |  |  |  |  |  |  |  | 0.83 (0.56-1.21)b |  |
|  |  | Hernández et al.,2008(44) | 125 | 161 | Ca | - |  | - |  |
|  |  |  |  |  |  |  |  | 1.52 (0.95-2.44)b |  |
|  |  | Siraj et al.,2008(35) | 203 | 513 | Ca | **-** |  | **-** |  |
|  |  |  |  |  |  |  |  | **0.72 (0.52-0.99)b** |  |
|  |  | Ho et al.,2006(45) | 201 | 680 | As | - |  | - |  |
|  |  |  |  |  |  |  |  | 1.10 (0.80-1.50)b |  |
|  |  | Bufalo et al.,2006(46) | 212 | 204 | Mi | - |  | - |  |
|  |  |  |  |  |  |  |  | 1.05 (0.70-1.56)b |  |
|  |  | Guilhen et al.,2009(47) | 164 | 196 | Mi | - |  | - |  |
|  |  |  |  |  |  |  |  | 1.58 (0.89-2.80)b |  |
|  |  | Reis et al.,2010(31) | 35 | 134 | Mi | - |  | - |  |
|  |  |  |  |  |  |  |  | 2.29 (1.05-4.98)b |  |
|  | **Meta-analyses from:** | Adjadj et al.,2009(48) | 537 | 1344 | Mi | **-** |  | **-** |  |
|  |  |  |  |  |  |  |  | **1.30 (1.00-1.40)b** |  |
|  |  | Li et al.,2012(49) | 728 | 880 | Ca | - |  | - |  |
|  |  |  |  |  |  |  |  | 1.17 (0.96-1.43)b |  |
| *GSTT1* | GSTT1*0 | Hernández et al.,2003(41) | 105 | 116 | Ca | - |  | - |  |
|  |  |  |  |  |  |  |  | 1.27 (0.64-2.53)b |  |
|  |  | Gaspar et al.,2004(42) | 73 | 204 | Ca | - |  | - |  |
|  |  |  |  |  |  |  |  | 1.46 (0.77-2.76)b |  |
|  |  | Lemos et al.,2008(43) | 188 | 247 | Ca | - |  | - |  |
|  |  |  |  |  |  |  |  | 0.66 (0.39-1.12)b |  |
|  |  | Hernández et al.,2008(44) | 174 | 161 | Ca | - |  | - |  |
|  |  |  |  |  |  |  |  | 1.08 (0.62-1.87)b |  |
|  |  | Siraj et al.,2008(35) | 207 | 513 | Ca | - |  | - |  |
|  |  |  |  |  |  |  |  | **3.48 (2.48-4.88)b** |  |
|  |  | Ho et al.,2006(45) | 201 | 680 | As | - |  | - |  |
|  |  |  |  |  |  |  |  | 1.40 (0.90-2.00)b |  |
|  |  | Bufalo et al.,2006(46) | 95 | 204 | Mi | - |  | - |  |
|  |  |  |  |  |  |  |  | 1.22 (0.66-2.26)b |  |
|  |  | Guilhen et al.,2009(47) | 164 | 196 | Mi | - |  | - |  |
|  |  |  |  |  |  |  |  | 1.72 (0.81-3.66)b |  |
|  |  | Reis et al.,2010(31) | 35 | 134 | Mi | - |  | - |  |
|  |  |  |  |  |  |  |  | **0.39 (0.18-0.85)b** |  |
|  | **Meta-analyses from:** | Adjadj et al.,2009(48) | 505 | 1300 | Mi | - |  | - |  |
|  |  |  |  |  |  |  |  | **1.03 (1.00-1.60)b** |  |
|  |  | Li et al.,2012(49) | 696 | 836 | Ca | - |  | - |  |
|  |  |  |  |  |  |  |  | 0.81 (0.61-0.99)b |  |
| *GSTP1* | rs1695; Ile105Val | Hernández et al.,2003(41) | 134 | 116 | Ca | 0.86 (0.59-1.27) | 1.07 (0.89-1.30) | 0.85 (0.50-1.47)a | 0.97 (0.75-1.26)a |
|  |  |  |  |  |  |  |  | 0.80 (0.36-1.47)b | 1.29 (0.83-1.99)b |
|  |  | Hernández et al.,2008(44) | 125 | 161 | Ca | 0.89 (0.63-1.24) |  | 0.77 (0.48-1.23)a |  |
|  |  |  |  |  |  |  |  | 0.94 (0.46-1.92)b |  |
|  |  | Siraj et al.,2008(35) | 47 | 507 | Ca | 0.82 (0.53-1.28) |  | 0.87 (0.46-1.65)a |  |
|  |  |  |  |  |  |  |  | 0.57 (0.19-1.75)b |  |
|  |  | Granja et al.,2004(50) | 77 | 157 | Mi | **4.56 (2.31-8.98)** |  | **8.44 (2.64-26.9)a** |  |
|  |  |  |  |  |  |  |  | **3.64 (1.11-11.9)b** |  |
| *GSTP1* | rs1138272; Ala114Val | Siraj et al.,2008(35) | 40 | 510 | Ca | 1.22 (0.64-2.31) |  | 0.92 (0.41-2.06)a |  |
|  |  |  |  |  |  |  |  | 3.24 (0.66-15.9)b |  |
| *MTF2* | rs549938 | Asc.-Kilfoy et al.,2012(38) | 341 | 449 | Ca | **0.68 (0.50-0.86)** | 1.10 (0.90-1.35) | **0.67 (0.50-0.90)a** | 1.01 (0.78-1.30)a |
|  |  |  |  |  |  |  |  | **0.43 (0.22-0.87)b** | 1.49 (0.87-2.57)b |
| *MTHFR* | rs1801133; Ala222Val | Siraj et al.,2008(35) | 49 | 511 | Ca | 1.47 (0.87-2.47) | 1.11 (0.93-1.33) | 1.77 (0.96-3.29)a | 1.20 (0.90-1.60)a |
|  |  |  |  |  |  |  |  | 0.95 (0.12-7.54)b | 1.21 (0.86-1.71)b |
|  |  | Prasad et al.,2011(51) | 97 | 241 | Ca | **2.20 (1.00-4.86)** |  | 2.21 (0.92-5.30)a |  |
|  |  |  |  |  |  |  |  | 2.65 (0.16-42.9)b |  |
|  |  | Fard-Esf. et al.,2011(52) | 154 | 198 | As | 1.04 (0.76-1.43) |  | 0.78 (0.50-1.21)a |  |
|  |  |  |  |  |  |  |  | 2.08 (0.82-5.25)b |  |
|  |  | Ozdemir et al.,2012(53) | 60 | 50 | Af | **1.92 (1.03-3.58)** |  | 2.11 (0.92-4.81)a |  |
|  |  |  |  |  |  |  |  | 2.75 (0.65-11.6)b |  |
| *MTHFR* | rs1801131; Glu429Ala | Ozdemir et al.,2012(53) | 60 | 50 | Af | 1.30 (0.73-2.29) | **0.80 (0.66-0.97)** | 1.64 (0.74-3.61)a | 0.86 (0.66-1.11)a |
|  |  |  |  |  |  |  |  | 1.36 (0.32-5.74)b | **0.60 (0.40-0.91)b** |
| *NAT1* | rs7003890 | Asc.-Kilfoy et al.,2012(38) | NA | NA | Ca | - | 1.15 (0.96-1.37) | 0.82 (0.58-1.15)a | 1.04 (0.78-1.37)a |
|  |  |  |  |  |  |  |  | 0.80 (0.52-1.21)b | 1.34 (0.94-1.91)b |
| *NAT1* | rs15561 | Asc.-Kilfoy et al.,2012(38) | NA | NA | Ca | - | 1.02 (0.84-1.23) | 0.66 (0.35-1.25)a | 0.91 (0.70-1.18)a |
|  |  |  |  |  |  |  |  | 0.81 (0.43-1.50)b | 1.19 (0.77-1.85)b |
| *NAT1* | rs4986993 | Asc.-Kilfoy et al.,2012(38) | NA | NA | Ca | - | 1.01 (0.83-1.22) | 0.85 (0.62-1.17)a | 0.91 (0.70-1.18)a |
|  |  |  |  |  |  |  |  | 1.23 (0.66-2.28)b | 1.16 (0.75-1.80)b |
| *NAT1* | rs9650592 | Asc.-Kilfoy et al.,2012(38) | NA | NA | Ca | - |  | 1.12 (0.77-1.61)a |  |
|  |  |  |  |  |  |  |  | 0.72 (0.19-2.71)b |  |
| *NAT1* | rs7387059 | Asc.-Kilfoy et al.,2012(38) | NA | NA | Ca | - |  | 0.82 (0.54-1.25)a |  |
|  |  |  |  |  |  |  |  | 0.92 (0.61-1.40)b |  |
| *NAT1* | rs7837181 | Asc.-Kilfoy et al.,2012(38) | NA | NA | Ca | - |  | 0.92 (0.67-1.26)a |  |
|  |  |  |  |  |  |  |  | 0.67 (0.40-1.15)b |  |
| *NAT1* | rs7829368 | Asc.-Kilfoy et al.,2012(38) | NA | NA | Ca | - | 1.11 (0.92-1.34) | 1.17 (0.70-1.98)a | 1.03 (0.80-1.33)a |
|  |  |  |  |  |  |  |  | 1.19 (0.71-1.99)b | 1.36 (0.88-2.09)b |
| *NAT1* | rs7821390 | Asc.-Kilfoy et al.,2012(38) | NA | NA | Ca | - | 1.14 (0.95-1.36) | 0.82 (0.59-1.15)a | 1.00 (0.76-1.31)a |
|  |  |  |  |  |  |  |  | 0.93 (0.61-1.42)b | 1.35 (0.94-1.93)b |
| *NAT2* | rs1799930; Arg197Gln | Hernández et al.,2008(44) | 109 | 148 | Ca | 1.22 (0.85-1.74) | 0.96 (0.79-1.16) | 1.22 (0.74-2.02)a | 1.00 (0.77-1.29)a |
|  |  |  |  |  |  |  |  | 1.34 (0.65-2.76)b | 0.86 (0.55-1.34)b |
|  |  | Siraj et al.,2008(35) | 198 | 512 | Ca | 1.14 (0.88-1.48) |  | 1.28 (0.91-1.82)a |  |
|  |  |  |  |  |  |  |  | 1.10 (0.61-1.98)b |  |
| *NAT2* | rs1799929; Leu161Leu | Hernández et al.,2008(44) | 109 | 148 | Ca | **0.70 (0.51-0.96)** | 0.97 (0.81-1.16) | 0.64 (0.37-1.10)a | 0.85 (0.64-1.11)a |
|  |  |  |  |  |  |  |  | **0.51 (0.27-0.96)b** | 0.99 (0.69-1.43)b |
| *NAT2* | rs1799931; Gly286Gln | Hernández et al.,2008(44) | 109 | 148 | Ca | 1.55 (0.59-4.05) |  | 2.22 (0.75-6.54)a |  |
|  |  |  |  |  |  |  |  | 0.34 (0.01-8.31)b |  |
| *NQO1* | rs1800566; Pro187Ser | Siraj et al.,2008(35) | 49 | 504 | Ca | 0.82 (0.49-1.36) | 0.94 (0.76-1.16) | 1.00 (0.54-1.85)a | 0.92 (0.71-1.19)a |
|  |  |  |  |  |  |  |  | 0.31 (0.04-2.33)b | 0.92 (0.53-1.61)b |
| *SOD1* | rs1041740 | Asc.-Kilfoy et al.,2012(38) | 339 | 443 | Ca | **1.42 (1.14-1.76)** | 1.12 (0.93-1.34) | **1.48 (1.09-2.00)a** | 1.20 (0.92-1.57)a |
|  |  |  |  |  |  |  |  | **1.86 (1.15-3.02)b** | 1.17 (0.80-1.71)b |
| *SOD1* | rs12626475 | Asc.-Kilfoy et al.,2012(38) | 344 | 452 | Ca | **1.33 (1.08-1.64)** | 1.10 (0.92-1.33) | 1.33 (0.98-1.79)a | 1.18 (0.91-1.54)a |
|  |  |  |  |  |  |  |  | **1.73 (1.09-2.73)b** | 1.16 (0.80-1.69)b |
| *UGT2B7* | rs3924194 | Asc.-Kilfoy et al.,2012(38) | 342 | 447 | Ca | **0.66 (0.49-0.88)** | 0.84 (0.61-1.16) | 0.74 (0.53-1.05)a | 0.82 (0.59-1.14)a |
|  |  |  |  |  |  |  |  | **0.31 (0.12-0.85)b** | 0.97 (0.16-5.82)b |
| *UGT2B7* | rs7657426 | Asc.-Kilfoy et al.,2012(38) | NA | NA | Ca | - | 0.90 (0.75-1.09) | 0.88 (0.64-1.20)a | 0.84 (0.65-1.09)a |
|  |  |  |  |  |  |  |  | 1.54 (0.92-2.59)b | 0.87 (0.58-1.30)b |
| *UGT2B7* | rs7699955 | Asc.-Kilfoy et al.,2012(38) | NA | NA | Ca | - | 1.02 (0.85-1.22) | 1.14 (0.77-1.68)a | 0.91 (0.69-1.20)a |
|  |  |  |  |  |  |  |  | 0.96 (0.63-1.49)b | 1.08 (0.76-1.53)b |
| *UGT2B7* | rs7375178 | Asc.-Kilfoy et al.,2012(38) | NA | NA | Ca | - | LD with rs7699955 | 0.89 (0.59-1.34)a | LD with rs7699955 |
|  |  |  |  |  |  |  |  | 0.85 (0.50-1.31)b |  |
| *UGT2B7* | rs10028494 | Asc.-Kilfoy et al.,2012(38) | NA | NA | Ca | - | 0.89 (0.71-1.11) | 1.28 (0.93-1.77)a | 0.85 (0.66-1.11)a |
|  |  |  |  |  |  |  |  | 1.25 (0.65-2.43)b | 0.88 (0.45-1.71)b |
| *UGT2B7* | rs3924192 | Asc.-Kilfoy et al.,2012(38) | NA | NA | Ca | - | LD with rs7699955 | 1.02 (0.73-1.43)a | LD with rs7699955 |
|  |  |  |  |  |  |  |  | 1.15 (0.75-1.77)b |  |
| *UGT2B7* | rs7435335 | Asc.-Kilfoy et al.,2012(38) | NA | NA | Ca | - | 1.05 (0.83-1.32) | 0.22 (0.05-1.01)a | 0.95 (0.72-1.24)a |
|  |  |  |  |  |  |  |  | 0.28 (0.06-1.24)b | 1.49 (0.74-2.99)b |
| *UGT2B7* | rs4356975 | Asc.-Kilfoy et al.,2012(38) | NA | NA | Ca | - | 0.91 (0.75-1.09) | 0.91 (0.66-1.24)a | 0.87 (0.67-1.13)a |
|  |  |  |  |  |  |  |  | 1.54 (0.92-2.60)b | 0.85 (0.57-1.27)b |
| *UGT2B7* | rs6600893 | Asc.-Kilfoy et al.,2012(38) | NA | NA | Ca | - | 1.06 (0.89-1.27) | 0.90 (0.61-1.34)a | 0.95 (0.71-1.27)a |
|  |  |  |  |  |  |  |  | 0.88 (0.58-1.36)b | 1.12 (0.80-1.57)b |
| *UGT2B7* | rs4535394 | Asc.-Kilfoy et al.,2012(38) | NA | NA | Ca | - | LD with rs6600893 | 0.92 (0.62-1.37)a | LD with rs6600893 |
|  |  |  |  |  |  |  |  | 0.89 (0.58-1.36)b |  |
| **Thyroid function** | | | | | | | | | |
| *CFTR* | rs4148682; -175T>G | Oh et al.,2012(54) | 105 | 323 | As | 1.14 (0.84-1.56) | 0.79 (0.55-1.15) | 1.11 (0.65-1.90)a | 0.80 (0.55-1.17)a |
|  |  |  |  |  |  |  |  | 1.29 (0.70-2.37)b | 0.64 (1.13-3.21)b |
| *CFTR* | rs213950; Val470Met | Oh et al.,2012(54) | 105 | 323 | As | 1.23 (0.89-1.68) | 1.06 (0.88-1.28) | 1.13 (0.68-1.88)a | 1.03 (0.80-1.34)a |
|  |  |  |  |  |  |  |  | 1.50 (0.81-2.78)b | 1.15 (0.78-1.70)b |
| *TG* | Gln2511Arg | Matakidou et al.,2004(55) | 304 | 396 | Ca | **1.33 (1.07-1.64)** |  | **1.48 (1.00-2.18)a** |  |
|  |  |  |  |  |  |  |  | **1.85 (1.19-2.89)b** |  |
| *TG* | rs180223; Ser734Ala | Akdi et al.,2011(56) | 393 | 474 | Ca | **1.34 (1.10-1.62)** | 0.91 (0.76-1.09) | **1.50 (1.10-2.03)a** | 0.80 (0.61-1.05)a |
|  |  |  |  |  |  |  |  | **1.70 (1.16-2.50)b** | 0.87 (0.61-1.25)b |
| *TG* | rs853326; Met1028Val | Akdi et al.,2011(56) | 396 | 474 | Ca | **1.33 (1.10-1.62)** | LD with rs180223 | **1.51 (1.11-2.05)a** | LD with rs180223 |
|  |  |  |  |  |  |  |  | **1.70 (1.16-2.49)b** |  |
| *TG* | rs2076740; Arg1999Trp | Akdi et al.,2011(56) | 317 | 452 | Ca | 0.91 (0.75-1.12) |  | 0.89 (0.66-1.20)a |  |
|  |  |  |  |  |  |  |  | 0.85 (0.56-1.29)b |  |
| *THRA* | rs939348 | Pastor et al.,2012(57) | 395 | 478 | Ca | 1.13 (0.91-1.40) | 1.02 (0.85-1.24) | 0.95 (0.72-1.26)a | 1.13 (0.87-1.45)a |
|  |  |  |  |  |  |  |  | **1.82 (1.04-3.19)b** | 0.91 (0.58-1.44)b |
| *THRB* | rs3752874; Phe245Phe | Pastor et al.,2012(57) | 337 | 478 | Ca | 0.86 (0.66-1.11) |  | 0.86 (0.64-1.16)a |  |
|  |  |  |  |  |  |  |  | 0.64 (0.21-1.93)b |  |
| *THRB* | rs826377 | Pastor et al.,2012(57) | 395 | 478 | Ca | 1.01 (0.79-1.29) | 1.00 (0.81-1.24) | 1.08 (0.81-1.45)a | 1.13 (0.87-1.46)a |
|  |  |  |  |  |  |  |  | 0.80 (0.67-1.73)b | 0.76 (0.44-1.32)b |
| *THRB* | rs844107 | Pastor et al.,2012(57) | 332 | 462 | Ca | 0.95 (0.78-1.16) | 0.97 (0.81-1.16) | 0.91 (0.68-1.21)a | 0.99 (0.75-1.30)a |
|  |  |  |  |  |  |  |  | 0.94 (0.62-1.42)b | 0.92 (0.64-1.33)b |
| *TPO* | rs2048722; 1495800A>G | Cipollini et al.,2013(58) | 1071 | 1244 | Ca | 0.90 (0.80-1.01) | 0.98 (0.82-1.17) | 0.98 (0.81-1.17)a | 1.01 (0.77-1.34)a |
|  |  |  |  |  |  |  |  | **0.79 (0.62-0.99)b** | 0.95 (0.67-1.36)b |
|  |  | Cipollini et al.,2013(58) | 393 | 475 | Ca | 1.14 (0.94-1.38) |  | **1.43 (1.04-1.95)a** |  |
|  |  |  |  |  |  |  |  | 1.25 (0.84-1.84)b |  |
| *TPO* | rs732609; Thr725Pro | Cipollini et al.,2013(58) | 1089 | 1280 | Ca | **0.86 (0.76-0.96)** | 0.96 (0.80-1.15) | 0.91 (0.77-1.08)a | 0.93 (0.71-1.21)a |
|  |  |  |  |  |  |  |  | **0.72 (0.57-0.91)b** | 0.94 (0.64-1.38)b |
|  |  | Cipollini et al.,2013(58) | 394 | 475 | Ca | **1.22 (1.00-1.47)** |  | **1.37 (1.02-1.84)a** |  |
|  |  |  |  |  |  |  |  | 1.39 (0.93-2.08)b |  |
| *TPO* | rs1042589; 1546327C>G | Cipollini et al.,2013(58) | 1180 | 1202 | Ca | 0.94 (0.84-1.05) | 0.89 (0.74-1.06) | 0.98 (0.81-1.18)a | 0.76 (0.56-1.03)a |
|  |  |  |  |  |  |  |  | 0.87 (0.69-1.10)b | 0.78 (0.54-1.11)b |
|  |  | Cipollini et al.,2013(58) | 337 | 475 | Ca | 0.94 (0.78-1.14) |  | 0.88 (0.65-1.19)a |  |
|  |  |  |  |  |  |  |  | 0.90 (0.62-1.32)b |  |
| *TRHR* | rs4129682; -9138C>T | Akdi et al.,2011(56) | 396 | 472 | Ca | 0.99 (0.82-1.19) | 0.88 (0.74-1.05) | 1.15 (0.83-1.58)a | 1.09 (0.83-1.44)a |
|  |  |  |  |  |  |  |  | 0.96 (0.65-1.41)b | 0.74 (0.52-1.04)b |
| *TRHR* | rs7823804; -1895T>G | Akdi et al.,2011(56) | 396 | 472 | Ca | 0.94 (0.77-1.14) | 0.94 (0.77-1.14) | 0.91 (0.69-1.22)a | 1.03 (0.80-1.34)a |
|  |  |  |  |  |  |  |  | 0.89 (0.57-1.41)b | 0.80 (0.52-1.22)b |
| *TSHR* | rs1991517; Asp727Glu | Sigurdson et al.,2009(4) | 828 | 843 | Ca | 1.00 (0.84-1.21) |  | 1.06 (0.85-1.32)a |  |
|  |  |  |  |  |  |  |  | 0.85 (0.49-1.48)b |  |
| *TSHR* | rs2075179; Asn187Asn | Sigurdson et al.,2009(4) | 847 | 873 | Ca | 0.99 (0.85-1.15) | 1.21 (0.91-1.61) | 0.99 (0.81-1.21)a | **1.37 (1.00-1.88)a** |
|  |  |  |  |  |  |  |  | 0.99 (0.70-1.39)b | 0.70 (0.26-1.89)b |
|  |  | Lönn et al.,2007(59) | 160 | 477 | Mi | 0.72 (0.48-1.08) |  | 0.70 (0.45-1.10)a |  |
|  |  |  |  |  |  |  |  | 0.61 (0.13-2.86)b |  |
| *TSHR* | IVS1+8651A>G | Sigurdson et al.,2009(4) | 824 | 852 | Ca | 1.02 (0.85-1.21) |  | 0.96 (0.78-1.18)a |  |
|  |  |  |  |  |  |  |  | 1.29 (0.74-2.23)b |  |
|  |  | Lönn et al.,2007(59) | 159 | 482 | Mi | 1.11 (0.80-1.52) |  | 0.94 (0.63-1.41)a |  |
|  |  |  |  |  |  |  |  | 1.84 (0.78-4.32)b |  |
| *TSHR* | rs11845164 | Pastor et al.,2012(57, 59) | 395 | 475 | Ca | 1.08 (0.83-1.41) | LD with rs2075179 | 0.96 (0.71-1.31)a | LD with rs2075179 |
|  |  |  |  |  |  |  |  | 2.22 (0.81-6.07)b |  |
| *TSHR* | rs8019570 | Pastor et al.,2012(57) | 395 | 478 | Ca | 1.09 (0.83-1.42) | LD with rs2075179 | 0.99 (0.73-1.35)a | LD with rs2075179 |
|  |  |  |  |  |  |  |  | 2.04 (0.73-5. 67)b |  |
| **MAPK pathway** | | | | | | | | | |
| *BRAF* | rs1042179; 2168G>A | Zhang et al.,2013(60) | 185 | 255 | As | 1.00 (0.69-1.44) |  | 1.12 (0.72-1.74)a |  |
|  |  |  |  |  |  |  |  | 0.70 (0.23-2.10)b |  |
| *BRAF* | rs11762469; 15353T>A | Zhang et al.,2013(60) | 186 | 255 | As | 1.11 (0.78-1.57) | 0.92 (0.77-1.10) | 1.13 (0.75-1.70)a | 0.84 (0.63-1.13)a |
|  |  |  |  |  |  |  |  | 1.14 (0.30-4.35)b | 0.84 (0.59-1.20)b |
| *BRAF* | rs17161747; 70825C>G | Zhang et al.,2013(60) | 186 | 254 | As | 0.94 (0.66-1.33) |  | 0.85 (0.56-1.30)a |  |
|  |  |  |  |  |  |  |  | 1.17 (0.44-3.11)b |  |
| *BRAF* | rs3748093; 129114A>T | Zhang et al.,2013(60) | 186 | 250 | As | 1.30 (0.94-1.81) |  | **1.74 (1.16-2.62)a** |  |
|  |  |  |  |  |  |  |  | 0.74 (0.27-2.01)b |  |
| *EPAC* | rs12422983; Gly332Ser | Lönn et al.,2007(59) | 159 | 482 | Mi | 0.85 (0.59-1.23) | 0.89 (0.71-1.12) | 0.87 (0.56-1.34)a | 0.88 (0.68-1.15)a |
|  |  |  |  |  |  |  |  | 0.73 (0.24-2.22)b | 0.80 (0.37-1.72)b |
| *HRAS* | rs12628; 81T>C | Khan et al.,2012(61) | 140 | 170 | Ca | **5.82 (3.80-8.93)** | **1.23 (1.02-1.48)** | **6.66 (3.66-12.1)a** | **1.51 (1.16-1.96)a** |
|  |  |  |  |  |  |  |  | **9.86 (4.08-23.8)b** | 1.31 (0.89-1.92)b |
| *PDGFRA* | rs6554162; -1309A>G | Kim et al.,2012(62) | 93 | 212 | As | **0.52 (0.33-0.81)** | 1.05 (0.85-1.30) | **0.39 (0.23-0.69)a** | 1.07 (0.83-1.39)a |
|  |  |  |  |  |  |  |  | 0.54 (0.17-1.75)b | 1.04 (0.57-1.89)b |
| *PDGFRA* | rs1800812; -635G>T | Kim et al.,2012(62) | 93 | 212 | As | **0.54 (0.31-0.94)** | 1.06 (0.83-1.36) | **0.43 (0.23-0.81)a** | 1.06 (0.80-1.40)a |
|  |  |  |  |  |  |  |  | 0.95 (0.17-5.29)b | 1.12 (0.49-2.60)b |
| *PDGFRB* | rs3828610; -202A>C | Kim et al.,2012(62) | 93 | 211 | As | 0.79 (0.55-1.14) | **1.22 (1.03-1.46)** | 0.81 (0.49-1.36)a | **1.49 (1.12-2.00)a** |
|  |  |  |  |  |  |  |  | 0.54 (0.22-1.35)b | **1.46 (1.04-2.05)b** |
| *RET* | rs1800858; Ala45Ala | Ho et al.,2005(63) | 101 | 174 | Ca | 1.14 (0.77-1.71) |  | 1.50 (0.89-2.52)a |  |
|  |  |  |  |  |  |  |  | 0.76 (0.26-2.23)b |  |
|  |  | Sigurdson et al.,2009(4) | 859 | 895 | Ca | 0.92 (0.80-1.06) |  | **0.82 (0.67-1.00)a** |  |
|  |  |  |  |  |  |  |  | 0.95 (0.70-1.30)b |  |
|  |  | Lönn et al.,2007(59) | 156 | 484 | Mi | 0.90 (0.67-1.22) |  | 0.83 (0.56-1.23)a |  |
|  |  |  |  |  |  |  |  | 0.97 (0.46-2.06)b |  |
|  | **Meta-analysis from:** | Adjadj et al.,2009(48) | 509 | 980 | MI | 0.90 (0.70-1.20) |  | - |  |
|  |  |  |  |  |  |  |  | - |  |
| *RET* | rs1800860; Ala432Ala | Ho et al.,2005(63) | 101 | 174 | Ca | 1.15 (0.78-1.69) | 0.92 (0.75-1.12) | **2.00 (1.20-3.36)a** | 0.80 (0.62-1.04)a |
|  |  |  |  |  |  |  |  | 0.39 (0.11-1.39)b | 1.06 (0.65-1.72)b |
| *RET* | rs1799939; Gly691Ser | Ho et al.,2005(63) | 101 | 174 | Ca | 0.79 (0.50-1.25) | 1.14 (0.92-1.41) | 0.67 (0.38-1.19)a | 1.29 (0.99-1.67)a |
|  |  |  |  |  |  |  |  | 0.97 (0.32-3.07)b | 0.93 (0.51-1.67)b |
|  |  | Sigurdson et al.,2009(4) | 871 | 900 | Ca | 1.04 (0.88-1.23) |  | 1.02 (0.84-1.25)a |  |
|  |  |  |  |  |  |  |  | 1.15 (0.69-1.93)b |  |
|  |  | Lönn et al.,2007(59) | 159 | 487 | Mi | **1.40 (1.00-1.89)** |  | 1.37 (0.93-2.03)a |  |
|  |  |  |  |  |  |  |  | 1.84 (0.76-4.45)b |  |
|  | **Meta-analysis from:** | Adjadj et al.,2009(48) | 509 | 980 | Mi | 0.90 (0.70-1.20) |  | - |  |
|  |  |  |  |  |  |  |  | - |  |
| *RET* | rs1800861; Leu769Leu | Ho et al.,2005(63) | 101 | 174 | Ca | 1.19 (0.78-1.82) | 0.97 (0.79-1.19) | 1.50 (0.90-2.51)a | 0.95 (0.74-1.23)a |
|  |  |  |  |  |  |  |  | 0.56 (0.11-2.79)b | 0.96 (0.57-1.64)b |
|  |  | Sigurdson et al.,2009(4) | 869 | 902 | Ca | 1.03 (0.90-1.18) |  | 1.01 (0.83-1.24)a |  |
|  |  |  |  |  |  |  |  | 1.07 (0.81-1.41)b |  |
|  |  | Lönn et al.,2007(59) | 158 | 482 | Mi | 0.89 (0.66-1.22) |  | 0.78 (0.53-1.15)a |  |
|  |  |  |  |  |  |  |  | 1.10 (0.49-2.47)b |  |
|  | **Meta-analysis from:** | Adjadj et al.,2009(48) | 509 | 980 | Mi | 0.90 (0.70-1.20) |  | - |  |
|  |  |  |  |  |  |  |  | - |  |
| *RET* | rs1800862; Ser836Ser | Ho et al.,2005(63) | 101 | 174 | Ca | 2.44 (0.97-6.19) |  | 2.54 (0.99-6.53)a |  |
|  |  |  |  |  |  |  |  | - |  |
|  |  | Sigurdson et al.,2009(4) | 879 | 911 | Ca | **1.43 (1.02-2.00)** |  | **1.45 (1.03-2.05)a** |  |
|  |  |  |  |  |  |  |  | **-** |  |
|  |  | Lönn et al.,2007(59) | 161 | 484 | Mi | 0.93 (0.49-1.75) |  | 0.92 (0.48-1.77)a |  |
|  |  |  |  |  |  |  |  | - |  |
|  | **Meta-analysis from:** | Adjadj et al.,2009(48) | 509 | 980 | Mi | 1.00 (0.70-1.50) |  | - |  |
|  |  |  |  |  |  |  |  | - |  |
| *RET* | rs1800863; Ser904Ser | Ho et al.,2005(63) | 101 | 174 | Ca | 0.78 (0.49-1.22) | LD with rs1799939 | 0.65 (0.37-1.16)a | LD with rs1799939 |
|  |  |  |  |  |  |  |  | 0.96 (0.30-3.04)b |  |
| **Immune response and inflammation** | | | | | | | | | |
| *ALOX12* | rs1126667; Gln261Arg | Prasad et al.,2012(64) | 101 | 317 | Ca | **2.06 (1.45-2.93)** | 0.99 (0.83-1.89) | **3.01 (1.88-4.82)a** | **1.34 (1.02-1.75)a** |
|  |  |  |  |  |  |  |  | 2.75 (0.49-15.6)b | 0.85 (0.59-1.22)b |
| *HEMGN* | rs10984462 | Brenner et al.,2013(65) | 343 | 452 | Ca | **0.69 (0.54-0.87)** |  | 0.78 (0.58-1.06)a |  |
|  |  |  |  |  |  |  |  | **0.37 (0.19-0.71)b** |  |
| *IL1B* | rs1143627; -31C>T | Ban et al.,2012(66) | 93 | 324 | As | 0.81 (0.58-1.12) | 1.05 (0.87-1.26) | 1.21 (0.70-2.11)a | 0.95 (0.73-1.23)a |
|  |  |  |  |  |  |  |  | 0.62 (0.31-1.24)b | 1.19 (0.80-1.77)b |
| *IL1B* | rs3917356 | Ban et al.,2012(66) | 93 | 324 | As | 0.85 (0.61-1.18) | 0.95 (0.79-1.13) | 1.17 (0.69-1.97)a | 0.97 (0.73-1.28)a |
|  |  |  |  |  |  |  |  | 0.64 (0.31-1.31)b | 0.89 (0.62-1.26)b |
| *IL1B* | rs1143630 | Ban et al.,2012(66) | 93 | 324 | As | 1.04 (0.70-1.55) | 1.02 (0.76-1.37) | 1.03 (0.62-1.70)a | 0.94 (0.68-1.30)a |
|  |  |  |  |  |  |  |  | 1.11 (0.39-3.14)b | 1.65 (0.51-5.31)b |
| *IL1B* | rs3136558 | Ban et al.,2012(66) | 93 | 324 | As | 0.74 (0.53-1.03) | 1.03 (0.83-1.28) | 0.67 (0.40-1.15)a | 0.89 (0.69-1.16)a |
|  |  |  |  |  |  |  |  | 0.55 (0.28-1.07)b | 1.66 (0.86-3.20)b |
| *IL1B* | rs1143633 | Ban et al.,2012(66) | 93 | 324 | As | 1.25 (0.90-1.74) | 1.01 (0.84-1.22) | **1.79 (1.05-3.05)a** | 1.10 (0.85-1.43)a |
|  |  |  |  |  |  |  |  | 1.40 (0.67-2.93)b | 0.96 (0.65-1.41)b |
| *IL1B* | rs1143637 | Ban et al.,2012(66) | 93 | 324 | As | 0.57 (0.22-1.49) | 1.02 (0.83-1.26) | 0.56 (0.21-1.48)a | 1.03 (0.80-1.33)a |
|  |  |  |  |  |  |  |  | - | 1.02 (0.60-1.73)b |
| *IL1B* | rs1143643 | Ban et al.,2012(66) | 93 | 324 | As | 1.20 (0.87-1.67) | LD with rs1143633 | **1.92 (1.07-3.45)a** | LD with rs1143633 |
|  |  |  |  |  |  |  |  | 1.45 (0.70-2.99)b |  |
| *IL1R1* | rs3917225; -1099A>G | Park et al.,2012(67) | 118 | 347 | As | 0.88 (0.65-1.19) | 0.98 (0.81-1.18) | 0.77 (0.49-1.21)a | 1.04 (0.80-1.36)a |
|  |  |  |  |  |  |  |  | 0.85 (0.45-1.60)b | 0.91 (0.61-1.35)b |
| *IL1R1* | rs2192752; -1028A>C | Park et al.,2012(67) | 118 | 347 | As | 1.34 (0.92-1.97) | 0.89 (0.74-1.08) | 1.37 (0.86-2.17)a | 0.95 (0.74-1.23)a |
|  |  |  |  |  |  |  |  | 1.63 (0.54-4.91)b | 0.71 (0.45-1.13)b |
| *IL1R1* | rs949963; -615G>A | Park et al.,2012(67) | 115 | 347 | As | 0.82 (0.58-1.15) | **1.28 (1.03-1.60)** | 0.71 (0.45-1.11)a | **1.45 (1.11-1.90)a** |
|  |  |  |  |  |  |  |  | 0.87 (0.37-2.03)b | 1.15 (0.63-2.09)b |
| *IL11* | rs1126757; Ala82Ala | Eun et al.,2012(68) | 94 | 213 | As | 1.02 (0.69-1.50) |  | 0.84 (0.50-1.40)a |  |
|  |  |  |  |  |  |  |  | 1.45 (0.56-3.76)b |  |
| *IL11RA* | rs1061758; -106A>G | Eun et al.,2012(68) | 94 | 213 | As | **1.62 (1.14-2.28)** | **1.29 (1.02-1.65)** | **3.03 (1.52-6.06)a** | 1.24 (0.94-1.64)a |
|  |  |  |  |  |  |  |  | **3.16 (1.42-7.04)b** | 1.87 (0.89-3.93)b |
| *IL32* | rs28372698 | Plantinga et al.,2013(69) | 139 | 138 | Ca | 1.39 (0.98-1.97) |  | **1.78 (1.07-3.00)a** |  |
|  |  |  |  |  |  |  |  | 1.62 (0.78-3.38)b |  |
| *MASP1* | rs850316 | Brenner et al.,2013(65) | 344 | 452. | Ca | **1.46 (1.20-1.78)** | 1.07 (0.90-1.28) | **1.66 (1.19-2.33)a** | 0.99 (0.74-1.31)a |
|  |  |  |  |  |  |  |  | **2.11 (1.40-3.18)b** | 1.17 (0.82-1.67)b |
| *OSMR* | rs2278329; Asp553Asn | Hong et al.,2011(70) | 85 | 286 | As | 0.70 (0.47-1.03) |  | 0.75 (0.45-1.25)a |  |
|  |  |  |  |  |  |  |  | 0.45 (0.17-1.23)b |  |
| *OSMR* | rs2292016; -100G>T | Hong et al.,2011(70) | 84 | 273 | As | 0.73 (0.49-1.07) |  | 0.64 (0.38-1.09)a |  |
|  |  |  |  |  |  |  |  | 0.66 (0.28-1.53)b |  |
| *SERPINA5* | rs6115; Ser64Asn | Brenner et al.,2013(65) | 338 | 443 | Ca | **1.72 (1.40-2.12)** | LD with rs6112 | **1.76 (1.29-2.41)a** | LD with rs6112 |
|  |  |  |  |  |  |  |  | **2.52 (1.66-3.83)b** |  |
| *SERPINA5* | rs6112; Pro159Pro | Brenner et al.,2013(65) | 344 | 452 | Ca | **1.61 (1.31-1.99)** | 1.02 (0.85-1.24) | **1.76 (1.30-2.37)a** | 1.09 (0.84-1.41)a |
|  |  |  |  |  |  |  |  | **2.74 (1.63-4.62)b** | 0.98 (0.65-1.49)b |
| *SERPINA5* | rs6108 | Brenner et al.,2013(65) | 342 | 450 | Ca | **1.48 (1.20-1.81)** | 1.04 (0.86-1.26) | **1.39 (1.02-1.89)a** | 1.09 (0.84-1.41)a |
|  |  |  |  |  |  |  |  | **2.41 (1.53-3.78)b** | 1.02 (0.67-1.56)b |
| *SERPINA5* | rs10139508 | Brenner et al.,2013(65) | 342 | 452 | Ca | **1.38 (1.12-1.70)** |  | **1.59 (1.18-2.15)a** |  |
|  |  |  |  |  |  |  |  | **1.81 (1.11-2.94)b** |  |
| *TICAM1* | rs2292151; Asp557Asp | Brenner et al.,2013(65) | 344 | 449 | Ca | **1.46 (1.16-1.84)** | 1.09 (0.89-1.34) | **1.43 (1.06-1.93)a** | 0.91 (0.70-1.18)a |
|  |  |  |  |  |  |  |  | **2.15 (1.19-3.88)b** | 1.69 (0.99-2.91)b |
| *TLR1* | rs4833095; Asn248Ser | Kim et al.,2013(71) | 94 | 325 | As | 0.88 (0.63-1.24) | 1.05 (0.88-1.26) | 0.68 (0.41-1.13)a | 1.06 (0.81-1.40)a |
|  |  |  |  |  |  |  |  | 0.94 (0.48-1.13)b | 1.10 (0.77-1.57)b |
| *TLR2* | rs3804099; Asn199Asn | Kim et al.,2012(72) | 130 | 321 | As | 0.94 (0.68-1.28) | 1.02 (0.85-1.22) | 1.22 (0.80-1.86)a | 1.08 (0.82-1.43)a |
|  |  |  |  |  |  |  |  | 0.59 (0.26-1.34)b | 1.02 (0.72-1.45)b |
| *TLR2* | rs3804100; Ser450Ser | Kim et al.,2012(72) | 133 | 321 | As | 0.97 (0.71-1.33) | 1.19 (0.83-1.71) | 1.29 (0.85-1.97)a | 1.26 (0.87-1.81)a |
|  |  |  |  |  |  |  |  | 0.61 (0.27-1.38)b | - |
| *TLR6* | rs5743818; Ala644Ala | Kim et al.,2013(71) | 94 | 325 | As | 0.43 (0.10-1.87) | 1.10 (0.88-1.38) | 0.42 (0.10-1.86)a | 1.11 (0.85-1.46)a |
|  |  |  |  |  |  |  |  | - | 1.17 (0.62-2.20)b |
| *TLR6* | rs3821985; Thr361Thr | Kim et al.,2013(71) | 94 | 325 | As | 1.28 (0.91-1.81) | LD with rs3775073 | 1.21 (0.74-1.99)a | LD with rs3775073 |
|  |  |  |  |  |  |  |  | 1.68 (0.80-3.47)b |  |
| *TLR6* | rs3775073; Lys421Lys | Kim et al.,2013(71) | 94 | 325 | As | 1.28 (0.91-1.81) | 1.14 (0.94-1.38) | 1.21 (0.74-1.99)a | 1.12 (0.86-1.44)a |
|  |  |  |  |  |  |  |  | 1.67 (0.80-3.47)b | 1.34 (0.87-2.06)b |
| *TLR10* | rs11096957; His241Asn | Kim et al.,2013(71) | 94 | 325 | As | 1.08 (0.77-1.50) | **1.22 (1.02-1.45)** | 1.17 (0.71-1.95)a | 1.08 (0.81-1.44)a |
|  |  |  |  |  |  |  |  | 1.11 (0.57-2.13)b | **1.48 (1.05-2.09)b** |
| *TLR10* | rs11466653; Thr326Met | Kim et al.,2013(71) | 94 | 325 | As | 0.77 (0.45-1.30) | **2.06(1.30-3.26)** | 0.69 (0.39-1.24)a | **2.03 (1.29-3.17)a** |
|  |  |  |  |  |  |  |  | 1.61 (0.14-17.9)b | **-** |
| *TLR10* | rs11096955; Ile369Leu | Kim et al.,2013(71) | 94 | 325 | As | 1.08 (0.77-1.50) | LD with rs11096957 | 1.17 (0.71-1.95)a | LD with rs11096957 |
|  |  |  |  |  |  |  |  | 1.11 (0.57-2.13)b |  |
| *TLR10* | rs4129009; Val775Ile | Kim et al.,2013(71) | 94 | 325 | As | 1.00 (0.72-1.40) | 0.90 (0.74-1.09) | 0.97 (0.58-1.60)a | 0.92 (0.71-1.20)a |
|  |  |  |  |  |  |  |  | 1.02 (0.51-2.04)b | 0.78 (0.50-1.21)b |
| **Other cancer genes** | | | | | | | | | |
| *ATG16L1* | rs2241880; Thr300Ala | Huijbers et al.,2012(73) | 139 | 1964 | Ca | **0.76 (0.60-0.98)** | **0.83 (0.70-0.99)** | 0.67 (0.44-1.01)a | 0.97 (0.73-1.30)a |
|  |  |  |  |  |  |  |  | **0.57 (0.35-0.93)b** | **0.67 (0.47-0.95)b** |
| *BMP3* | rs13138132; -1919C>A | Kim et al.,2013(74) | 105 | 324 | As | 1.24 (0.82‑1.86) | 1.11 (0.90-1.39) | 1.29 (0.80-2.07)a | 1.18 (0.90-1.53)a |
|  |  |  |  |  |  |  |  | 1.34 (0.25-7.07)b | 1.07 (0.60-1.93)b |
| *BMP3* | rs3733549; Arg192Gln | Kim et al.,2013(74) | 103 | 324 | As | 1.36 (0.93-2.00) | 0.88 (0.62-1.26) | 1.07 (0.66-1.75)a | 0.94 (0.64-1.34)a |
|  |  |  |  |  |  |  |  | **3.96 (1.28‑12.2)b** | - |
| *CDH1* | rs16260; -160C>A | Wang et al.,2012(75) | 92 | 169 | As | **1.71 (1.17-2.49)** | 0.92 (0.76-1.11) | **2.42 (1.39-4.22)a** | 1.15 (0.89-1.49)a |
|  |  |  |  |  |  |  |  | 2.10 (0.90-4.87)b | **0.66 (0.44-1.00)b** |
| *CDH1* | rs3743674; +54T>C | Wang et al.,2012(75) | 95 | 163 | As | 0.98 (0.64-1.50) | 1.31 (0.97-1.76) | 0.88 (0.50-1.55)a | 1.32 (0.97-1.81)a |
|  |  |  |  |  |  |  |  | 1.11 (0.43-2.87)b | 1.64 (0.42-6.39)b |
| *CDH1* | rs5030625; -347G>GA | Wang et al.,2012(75) | 97 | 165 | As | **0.46 (0.29-0.74)** |  | **0.45 (0.25-0.83)a** |  |
|  |  |  |  |  |  |  |  | **0.32 (0.10-1.00)b** |  |
| *COL11A1* | rs12731843; Lys276Asn | Park et al.,2011(76) | 98 | 336 | As | 0.69 (0.36-1.34) | 1.01 (0.71-1.42) | 0.76 (0.38-1.51)a | 1.00 (0.70-1.43)a |
|  |  |  |  |  |  |  |  | 0.51 (0.03-9.94)b | 1.02 (0.17-6.15)b |
| *COL11A1* | rs3753841; Pro1335Leu | Park et al.,2011(76) | 98 | 336 | As | 0.71 (0.50-1.01) | 1.05 (0.88-1.26) | 0.67 (0.42-1.07)a | 1.11 (0.85-1.44)a |
|  |  |  |  |  |  |  |  | 0.56 (0.25-1.26)b | 1.07 (0.74-1.54)b |
| *COL11A1* | rs1763347; Gly1516Gly | Park et al.,2011(76) | 98 | 336 | As | **0.61 (0.42-0.89)** | 1.06 (0.85-1.33) | **0.59 (0.37-0.95)a** | 1.23 (0.94-1.60)a |
|  |  |  |  |  |  |  |  | 0.37 (0.13-1.09)b | 0.76 (0.42-1.39)b |
| *COL11A1* | rs2229783; Ile1602Ile | Park et al.,2011(76) | 98 | 336 | As | **0.62 (0.44-0.88)** | 1.04 (0.87-1.24) | **0.66 (0.41-1.06)a** | 1.16 (0.88-1.52)a |
|  |  |  |  |  |  |  |  | **0.35 (0.15-0.83)b** | 1.03 (0.72-1.45)b |
| *DACT3* | rs314659 | Neta et al.,2011(3) | 344 | 452 | Ca | **-** |  | **1.59 (1.16-2.18)a** |  |
|  |  |  |  |  |  |  |  | **2.18 (1.26-3.77)b** |  |
| *ESR1* | rs2228480; Thr594Thr | Rebaї et al.,2009(77) | 106 | 229 | Af | **4.29 (3.04-6.07)** | 0.78 (0.61-1.01) | **8.81 (4.46-17.1)a** | 0.81 (0.61-1.07)a |
|  |  |  |  |  |  |  |  | **17.8 (7.81-40.8)b** | 0.51 (0.21-1.24)b |
| *FOSB* | rs12373539; -158G>A | Han et al.,2012(78) | 94 | 260 | As | 0.79 (0.55-1.14) | 0.84 (0.63-1.12) | 0.74 (0.45-1.22)a | 0.84 (0.63-1.11)a |
|  |  |  |  |  |  |  |  | 0.66 (0.27-1.62)b | 0.87 (0.39-1.91)b |
| *FOSB* | rs2282695; Ala39Ala | Han et al.,2012(78) | 94 | 260 | As | **1.57 (1.10-2.24)** |  | **1.67 (1.01-2.78)a** |  |
|  |  |  |  |  |  |  |  | **2.21 (1.02-4.79)b** |  |
| *FTO* | rs17817288 | Kitahara et al.,2012(79) | 340 | 444 | Ca | **1.37 (1.12-1.68)** | **1.28 (1.07-1.53)** | **1.46 (1.01-2.11)a** | 1.31 (0.99-1.74)a |
|  |  |  |  |  |  |  |  | **1.98 (1.30-3.02)b** | **1.63 (1.15-2.30)b** |
| *FTO* | rs11642841 | Kitahara et al.,2012(79) | 341 | 444 | Ca | **0.74 (0.60-0.91)** | **0.78 (0.65-0.93)** | **0.64 (0.47-0.87)a** | 0.88 (0.67-1.16)a |
|  |  |  |  |  |  |  |  | **0.61 (0.40-0.94)b** | **0.59 (0.42-0.84)b** |
| *FTO* | rs8047395 | Kitahara et al.,2012(79) | 341 | 440 | Ca | **1.39 (1.13-1.69)** |  | 1.23 (0.86-1.75)a |  |
|  |  |  |  |  |  |  |  | **1.97 (1.30-2.96)b** |  |
| *FTO* | rs1121980 | Kitahara et al.,2012(79) | 340 | 442 | Ca | **0.76 (0.62-0.93)** | **0.75 (0.63-0.89)** | **0.70 (0.51-0.96)a** | 0.84 (0.63-1.19)a |
|  |  |  |  |  |  |  |  | **0.60 (0.39-0.92)b** | **0.55 (0.39-0.78)b** |
| *FTO* | rs8050136 | Kitahara et al.,2012(79) | 340 | 443 | Ca | **0.77 (0.62-0.94)** | LD with rs1121980 | **0.73 (0.54-1.00)a** | LD with rs1121980 |
|  |  |  |  |  |  |  |  | **0.59 (0.38-0.93)b** |  |
| *FTO* | rs9939609 | Kitahara et al.,2012(79) | 340 | 443 | Ca | **0.77 (0.62-0.94)** | **0.77 (0.65-0.93)** | **0.74 (0.54-1.00)a** | **0.88 (0.67-1.16)a** |
|  |  |  |  |  |  |  |  | **0.60 (0.38-0.93)b** | **0.58 (0.41-0.83)b** |
| *FTO* | rs1477196 | Kitahara et al.,2012(79) | 339 | 439 | Ca | **1.31 (1.07-1.62)** | 1.12 (0.93-1.36) | 1.28 (0.94-1.75)a | 1.05 (0.82-1.36)a |
|  |  |  |  |  |  |  |  | **1.76 (1.14-2.72)b** | 1.36 (0.87-2.11)b |
| *FTO* | rs7202116 | Kitahara et al.,2012(79) | 341 | 443 | Ca | **0.77 (0.63-0.95)** | LD with rs1121980 | 0.74 (0.55-1.01)a | LD with rs1121980 |
|  |  |  |  |  |  |  |  | **0.60 (0.38-0.93)b** |  |
| *FTO* | rs1861867 | Kitahara et al.,2012(79) | 340 | 444 | Ca | **1.30 (1.06-1.59)** |  | **1.46 (1.07-2.01)a** |  |
|  |  |  |  |  |  |  |  | **1.54 (1.03-2.31)b** |  |
| *GNB3* | rs5443; 825C>T | Sheu et al.,2007(80) | 104 | 321 | Ca | **0.64 (0.44-0.92)** | 1.09 (0.84-1.40) | 0.66 (0.42-1.05)a | 1.10 (0.85-1.42)a |
|  |  |  |  |  |  |  |  | 0.29 (0.09-1.01)b | 1.04 (0.70-1.56)b |
| *GNRH2* | rs4815558 | Schonfeld et al.,2012(37) | 274 | 423 | Ca | **0.67 (0.49-0.92)** |  | **0.72 (0.50-1.03)a** |  |
|  |  |  |  |  |  |  |  | **0.32 (0.09-1.14)b** |  |
| *HDAC4* | rs6749348 | Neta et al.,2011(3) | 344 | 452 | Ca | **-** | 0.85 (0.62-1.16) | **0.41 (0.26-0.65)a** | 0.78 (0.56-1.08)a |
|  |  |  |  |  |  |  |  | **0.28 (0.03-2.46)b** | 1.92 (0.39-9.56)b |
| *HDAC4* | rs507159 | Neta et al.,2011(3) | 344 | 425 | Ca | **-** |  | **0.68 (0.49-0.93)a** |  |
|  |  |  |  |  |  |  |  | **0.39 (0.23-0.67)b** |  |
| *HDAC4* | rs7584828 | Neta et al.,2011(3) | 344 | 425 | Ca | **-** | 0.82 (0.64-1.05) | **0.55 (0.38-0.79)a** | **0.76 (0.58-1.00)a** |
|  |  |  |  |  |  |  |  | **0.33 (0.08-1.28)b** | **0.96 (0.41-2.25)b** |
| *HER2* | rs1801200 | Rebaї et al.,2009(81) | 106 | 286 | Af | **1.88 (1.18-3.01)** | 1.00 (0.79-1.28) | 1.36 (0.78-2.37)a | 0.96 (0.73-1.26)a |
|  |  |  |  |  |  |  |  | - | 1.32 (0.53-3.31)b |
| *HSD17B3* | rs10739847 | Schonfeld et al.,2012(37) | 452 | 91 | Ca | **1.24 (1.01-1.51)** |  | 1.12 (0.80-1.56)a |  |
|  |  |  |  |  |  |  |  | **1.52 (1.02-2.24)b** |  |
| *HSD3B1* | rs3765945 | Baida et al.,2008(33) | 199 | 16 | Ca | 1.09 (0.79-1.51) | 0.99 (0.83-1.18) | 1.14 (0.72-1.81)a | 0.96 (0.73-1.26)a |
|  |  |  |  |  |  |  |  | 1.19 (0.50-2.82)b | 0.99 (0.69-1.42)b |
| *IGF1R* | rs3743262; Thr766Thr | Cho et al.,2012(82) | 105 | 312 | As | 0.76 (0.54-1.06) |  | 0.78 (0.49-1.24)a |  |
|  |  |  |  |  |  |  |  | 0.52 (0.23-1.20)b |  |
| *IGF1R* | rs2229765; Glu1043Glu | Cho et al.,2012(82) | 105 | 312 | As | **0.56 (0.39-0.80)** | 0.94 (0.79-1.13) | **0.56 (0.35-0.90)a** | 0.86 (0.66-1.13)a |
|  |  |  |  |  |  |  |  | **0.28 (0.11-0.76)b** | 0.94 (0.64-1.38)b |
| *IGF1* | CA repeat | Xu et al.,2012(83) | 151 | 398 | Ca | 0.96 (0.73-1.28) |  | 1.23 (0.83-1.82)a |  |
|  |  |  |  |  |  |  |  | 0.67 (0.33-1.37)b |  |
| *INSR* | rs919275 | Kitahara et al.,2012(79) | 336 | 440 | Ca | **0.79 (0.64-0.97)** | 1.03 (0.86-1.23) | **0.67 (0.49-0.93)a** | 0.94 (0.71-1.24)a |
|  |  |  |  |  |  |  |  | **0.64 (0.41-0.98)b** | 1.09 (0.77-1.56)b |
| *ITGA6* | rs2141698; -1687A>G | Kim et al.,2011(84) | 104 | 318 | As | 0.94 (0.55-1.58) | 0.97 (0.80-1.19) | 1.07 (0.61-1.89)a | 0.94 (0.73-1.21)a |
|  |  |  |  |  |  |  |  | 0.34 (0.02-6.35)b | 1.01 (0.61-1.69)b |
| *ITGA6* | rs11895564; Ala380Thr | Kim et al.,2011(84) | 104 | 318 | As | **2.04 (1.24-3.37)** | 1.15 (0.95-1.39) | **1.96 (1.12-3.43)a** | 1.01 (0.78-1.31)a |
|  |  |  |  |  |  |  |  | 7.03 (0.64-78.5)b | 1.44 (0.96-2.18)b |
| *ITGB1* | rs2298141; Cys261Cys | Eun et al.,2013(85) | 94 | 123 | As | 0.83 (0.55-1.25) | 0.97 (0.78-1.20) | 0.79 (0.46-1.35)a | 1.00 (0.77-1.31)a |
|  |  |  |  |  |  |  |  | 0.80 (0.32-2.03)b | 0.83 (0.45-1.55)b |
| *ITGB1* | rs2230396; Gly392Gly | Eun et al.,2013(85) | 94 | 213 | As | 0.90 (0.63-1.28) | 0.85 (0.65-1.12) | 0.67 (0.39-1.15)a | 0.78 (0.58-1.06)a |
|  |  |  |  |  |  |  |  | 0.97 (0.46-2.06)b | 1.16 (0.43-3.17)b |
| *ITGB2* | rs2070946; -149A>G | Eun et al.,2013(85) | 88 | 216 | As | 1.30 (0.78-2.14) | 0.85 (0.78-1.17) | 1.73 (0.98-3.04)a | 1.01 (0.78-1.31)a |
|  |  |  |  |  |  |  |  | 0.25 (0.01-4.57)b | 0.82 (0.50-1.34)b |
| *ITGB2* | rs235326; Val441Val | Eun et al.,2013(85) | 94 | 213 | As | 0.80 (0.52-1.26) | 0.91 (0.75-1.11) | 0.70 (0.40-1.23)a | 0.92 (0.71-1.20)a |
|  |  |  |  |  |  |  |  | 0.93 (0.31-2.79)b | 0.83 (0.54-1.28)b |
| *ITGB2* | rs2070947 | Eun et al.,2013(85) | 94 | 213 | As | 0.69 (0.45-1.05) | 1.00 (0.82-1.21) | **0.49 (0.29-0.85)a** | 0.97 (0.75-1.24)a |
|  |  |  |  |  |  |  |  | 0.97 (0.34-2.75)b | 1.05 (0.65-1.68)b |
| *MDR1* | rs1045642; Ile1145Ile | Ozdemir et al.,2013(86) | 60 | 58 | Af | **2.85 (1.58-5.14)** | 0.86 (0.72-1.03) | **2.63 (1.10-6.26)a** | 0.82 (0.61-1.10)a |
|  |  |  |  |  |  |  |  | **4.42 (1.42-13.7)b** | 0.75 (0.54-1.06)b |
| *OPN* | rs17524488; -156G>GG | Mu et al.,2013(87) | 363 | 413 | As | 0.86 (0.71-1.05) | 0.95 (0.78-1.14) | 0.82 (0.59-1.15)a | 0.81 (0.63-1.04)a |
|  |  |  |  |  |  |  |  | 0.74 (0.48-1.11)b | 1.08 (0.70-1.66)b |
| *OPN* | rs11730582; -443C>T | Mu et al.,2013(87) | 363 | 413 | As | **2.14 (1.74-2.62)** | 1.04 (0.87-1.24) | **2.05 (1.46-2.90)a** | 0.80 (0.59-1.08)a |
|  |  |  |  |  |  |  |  | **4.31 (2.85-6.52)**b | 1.08 (0.76-1.54)b |
| *OPN* | rs28357094; -66T>G | Mu et al.,2013(87) | 363 | 413 | As | 1.01 (0.80-1.24) |  | 1.01 (0.72-1.42)a |  |
|  |  |  |  |  |  |  |  | 1.03 (0.70-1.52)b |  |
| *PIK3CA* | rs17849071; 105T>G | Xing et al.,2012(88) | NA | NA | Ca | - | 0.71 (0.51-0.99) | 0.52 (0.23-1.19)a | 0.67 (0.47-0.96)a |
|  |  |  |  |  |  |  |  | - | 0.79 (0.21-2.95)b |
| *PTPRJ* | rs4752904; Asp872Glu | Iuliano et al.,2010(89) | 299 | 339 | Ca | **0.82 (0.65-1.02)** | 1.07 (0.90-1.28) | **0.58 (0.41-0.83)a** | 0.96 (0.72-1.28)a |
|  |  |  |  |  |  |  |  | **0.73 (0.47-1.15)b** | 1.19 (0.83-1.71)b |
| *SULF1* | rs6472462 | Schonfeld et al.,2012(37) | 343 | 450 | Ca | **1.28 (1.05-1.56)** | 1.09 (0.91-1.30) | 1.40 (0.97-2.02)a | 0.92 (0.69-1.23)a |
|  |  |  |  |  |  |  |  | **1.67 (1.11-2.50)b** | 1.19 (0.84-1.68)b |
| *VEGFA* | rs699947; -2578C>A | Hsiao et al.,2007(90) | 56 | 112 | Ca | **1.66 (1.11-2.50)** | 1.19 (0.99-1.42) | **1.89 (1.08-3.32)a** | 1.23 (0.94-1.63)a |
|  |  |  |  |  |  |  |  | 2.30 (0.87-6.13)b | 1.38 (0.97-1.96)b |
| *WWOX* | rs3764340; Pro282Ala | Cancemi et al.,2011(91) | 1741 | 1042 | Ca | **1.46 (1.13-1.87)** |  | **1.57 (1.21-2.06)a** |  |
|  |  |  |  |  |  |  |  | 0.63 (0.16-2.51)b |  |
| **GWAS or intergenic regions** | | | | | | | | | |
| 1p12-13 | rs4659200 | Baida et al.,2008(33) | 200 | 136 | Ca | 0.84 (0.61-1.15) | 0.97 (0.81-1.17) | 0.99 (0.62-1.60)a | 1.15 (0.88-1.50)a |
|  |  |  |  |  |  |  |  | 0.66 (0.35-1.26)b | 0.85 (0.58-1.24)b |
| 1p12-13 | rs2145418 | Baida et al.,2008(33) | 197 | 137 | Ca | **4.03 (2.86-5.66)** | 1.03 (0.82-1.30) | **4.94 (2.89-8.47)a** | 1.03 (0.79-1.34)a |
|  |  |  |  |  |  |  |  | **8.40 (4.37-16.2)b** | 1.09(0.54-2.20)b |
| 1p12-13 | rs7515409 | Baida et al.,2008(33) | 222 | 199 | Ca | 1.02 (0.78-1.34) | 0.94 (0.79-1.12) | 0.84 (0.54-1.31)a | 0.80 (0.60-1.07)a |
|  |  |  |  |  |  |  |  | 1.11 (0.62-1.97)b | 0.89 (0.63-1.26)b |
| 1p12-13 | rs1241 | Baida et al.,2008(33) | 201 | 135 | Ca | 0.90 (0.65-1.25) | 0.92 (0.76-1.10) | 0.69 (0.44-1.10)a | 1.09 (0.84-1.42)a |
|  |  |  |  |  |  |  |  | 0.74 (0.48-1.16)b | 0.73 (0.49-1.08)b |
| 1p31.3 | rs334725 | Gudmundsson et al.,2012(92) | 1156 | 42617 | Ca | **1.31 (1.08-1.60)** | 1.39 (0.91-2.13) | **-** | 1.33 (0.86-2.05)a |
|  |  |  |  |  |  |  |  | **-** | 2.74 (0.30-24.6)b |
| 2q35 | rs966423 | Gudmundsson et al.,2012(92) | 1150 | 414488 | Ca | **1.34 (1.22-1.47)** | **1.26 (1.06-1.51)** | **-** | 0.98 (0.74-1.28)a |
|  |  |  |  |  |  |  |  | **-** | **1.74 (1.21-2.50)b** |
|  |  | Liyanarachchi et al.,2013(93) | 605 | 916 | Ca | **1.30 (1.12-1.51)** |  | **-** |  |
|  |  |  |  |  |  |  |  | **-** |  |
|  |  | Liyanarachchi et al.,2013(93) | 1633 | 1663 | Ca | **1.14 (1.01-1.29)** |  | **-** |  |
|  |  |  |  |  |  |  |  | **-** |  |
|  |  | Wang et al.,2013(94) | 845 | 1005 | As | **1.31 (1.12-1.55)** |  | 1.33 (0.78-2.26)a |  |
|  |  |  |  |  |  |  |  | **1.76 (1.05-2.95)b** |  |
| 5q24 | rs2910164 | Jazdzewski et al.,2008(95) | 608 | 901 | Ca | 1.14 (0.96-1.34) | 0.95 (0.78-1.16) | **1.55 (1.25-1.91)a** | 0.94 (0.73-1.22)a |
|  |  |  |  |  |  |  |  | **0.50 (0.28-0.89)b** | 0.91 (0.56-1.47)b |
|  |  | Jones et al.,2012(96) | 748 | 6058 | Ca | 1.00 (0.88-1.14) |  | 1.01 (0.86-1.19)a |  |
|  |  |  |  |  |  |  |  | 0.98 (0.70-1.38)b |  |
|  |  | Wei et al.,2013(97) | 753 | 760 | As | 0.95 (0.82-1.09) |  | 0.88 (0.71-1.10)a |  |
|  |  |  |  |  |  |  |  | 0.93 (0.70-1.24)b |  |
| 8p12 | rs2439302 | Gudmundsson et al.,2012(92) | 1134 | 5625 | Ca | **1.36 (1.23-1.50)** | 1.12 (0.94-1.34) | **-** | 1.10 (0.83-1.45)a |
|  |  |  |  |  |  |  |  | **-** | 1.28 (0.90-1.83)b |
|  |  | Liyanarachchi et al.,2013(93) | 605 | 916 | Ca | **1.46 (1.26-1.70)** |  | **-** |  |
|  |  |  |  |  |  |  |  | **-** |  |
|  |  | Liyanarachchi et al.,2013(93) | 1633 | 1663 | Ca | **1.23 (1.09-1.38)** |  | **-** |  |
|  |  |  |  |  |  |  |  | **-** |  |
|  |  | Wang et al.,2013(94) | 845 | 1005 | As | **1.40 (1.20-1.65)** |  | **1.39 (1.14-1.70)a** |  |
|  |  |  |  |  |  |  |  | **1.96 (1.25-3.08)b** |  |
| 8q24 | rs6983267 | Akdi et al.,2011(56) | 330 | 463 | Ca | 0.98 (0.81-1.18) | 1.02 (0.86-1.22) | 1.14 (0.83-1.57)a | 1.15 (0.56-1.54)a |
|  |  |  |  |  |  |  |  | 0.94 (0.65-1.36)b | 1.03 (0.73-1.46)b |
|  |  | Jones et al.,2012(96) | 751 | 6115 | Ca | **1.14 (1.03-1.27)** |  | 1.01 (0.83-1.23)a |  |
|  |  |  |  |  |  |  |  | **1.27 (1.03-1.57)b** |  |
|  |  | Wang et al.,2013(94) | 845 | 1005 | As | 1.01 (0.88-1.15) |  | 0.99 (0.80-1.21)a |  |
|  |  |  |  |  |  |  |  | 1.01 (0.78-1.32)b |  |
| 8q24 | rs1447295 | Akdi et al.,2011(56) | 393 | 477 | Ca | 1.19 (0.83-1.71) | 1.00 (0.70-1.43) | 1.12 (0.75-1.66)a | 1.17 (0.81-1.69)a |
|  |  |  |  |  |  |  |  | 2.07 (0.49-8.71)b | - |
| 9q22 | rs965513 | Gudmundsson et al.,2009(98) | 962 | 38923 | Ca | **1.75 (1.59-1.94)** | **1.78 (1.48-2.14)** | - | **1.80 (1.37-2.35)a** |
|  |  |  |  |  |  |  |  | - | **3.08 (2.10-4.53)b** |
|  |  | Takahashi et al.,2010(99) | 667 | 620 | Ca | **1.65 (1.43-1.91)** |  | - |  |
|  |  |  |  |  |  |  |  | - |  |
|  |  | Jones et al.,2012(96) | 751 | 6120 | Ca | **1.96 (1.76-2.18)** |  | **2.12 (1.77-2.55)a** |  |
|  |  |  |  |  |  |  |  | **3.89 (3.10-4.86)b** |  |
|  |  | Tomaz et al.,2012(100) | 80 | 130 | Ca | **2.81 (1.87-4.22)** |  | - |  |
|  |  |  |  |  |  |  |  | - |  |
|  |  | Liyanarachchi et al.,2013(93) | 605 | 916 | Ca | **2.09 (1.80-2.42)** |  | - |  |
|  |  |  |  |  |  |  |  | - |  |
|  |  | Liyanarachchi et al.,2013(93) | 1633 | 1663 | Ca | **1.81 (1.59-2.06)** |  | - |  |
|  |  |  |  |  |  |  |  | - |  |
|  |  | Matsuse et al.,2013(101) | 479 | 2764 | As | **1.69 (1.29-2.21)** |  | - |  |
|  |  |  |  |  |  |  |  | - |  |
|  |  | Wang et al.,2013(94) | 845 | 1005 | As | **1.53 (1.23-1.90)** |  | **1.60 (1.26-2.04)a** |  |
|  |  |  |  |  |  |  |  | 1.63 (0.64-4.14)b |  |
| 9q22 | rs7048394 | Landa et al.,2009(102) | 520 | 504 | Ca | **1.46 (1.19-1.78)** | **1.55 (1.29-1.87)** | - | **1.39 (1.07-1.80)a** |
|  |  |  |  |  |  |  |  | - | **2.78 (1.80-4.28)b** |
| 9q22 | rs894673 | Landa et al.,2009(102) | 520 | 504 | Ca | **1.39 (1.17-1.65)** | **1.65 (1.38-1.97)** | - | **1.46 (1.09-1.95)a** |
|  |  |  |  |  |  |  |  | - | **2.92 (2.02-4.22)b** |
| 9q22 | rs3758249 | Landa et al.,2009(102) | 517 | 503 | Ca | **1.39 (1.17-1.66)** | LD with rs894673 | - | LD with rs894673 |
|  |  |  |  |  |  |  |  | - |  |
| 9q22 | rs907577 | Landa et al.,2009(102) | 518 | 503 | Ca | **1.39 (1.17-1.65)** | LD with rs894673 | - | LD with rs894673 |
|  |  |  |  |  |  |  |  | - |  |
| 9q22 | rs3021526; Ser275Ser | Landa et al.,2009(102) | 475 | 495 | Ca | **1.32 (1.11-1.58)** | LD with rs7048394 | - | LD with rs7048394 |
|  |  |  |  |  |  |  |  | - |  |
|  |  | Tomaz et al.,2012(100) | 80 | 130 | Ca | **1.89 (1.27-2.82)** |  | - |  |
|  |  |  |  |  |  |  |  | - |  |
| 9q22 | rs10119760 | Landa et al.,2009(102) | 518 | 504 | Ca | **1.47 (1.23-1.75)** | LD with rs894673 | - | LD with rs894673 |
|  |  |  |  |  |  |  |  | - |  |
| 9q22 | rs1867277 | Takahashi et al.,2010(99) | 660 | 820 | Ca | **1.48 (1.27-1.71)** | LD with rs894673 | - | LD with rs894673 |
|  |  |  |  |  |  |  |  | - |  |
|  |  | Jones et al.,2012(96) | 753 | 6087 | Ca | **1.75 (1.57-1.94)** |  | **1.99 (1.64-2.41)a** |  |
|  |  |  |  |  |  |  |  | **3.08 (2.46-3.84)b** |  |
|  |  | Tomaz et al.,2012(100) | 80 | 130 | Ca | **1.76 (1.18-2.62)** |  | - |  |
|  |  |  |  |  |  |  |  | - |  |
| 9q22 | rs7849497 | Tomaz et al.,2012(100) | 80 | 130 | Ca | **2.45 (1.60-3.76)** | LD with rs7048394 | - | LD with rs7048394 |
|  |  |  |  |  |  |  |  | - |  |
| 9q22 | rs1867278 | Tomaz et al.,2012(100) | 80 | 130 | Ca | **1.76 (1.18-2.62)** | LD with rs894673 | - | LD with rs894673 |
|  |  |  |  |  |  |  |  | - |  |
| 9q22 | rs1867279 | Tomaz et al.,2012(100) | 80 | 130 | Ca | **2.52 (1.64-3.86)** | LD with rs7048394 | - | LD with rs7048394 |
|  |  |  |  |  |  |  |  | - |  |
| 9q22 | rs1867280 | Tomaz et al.,2012(100) | 80 | 130 | Ca | **1.68 (1.13-2.49)** | LD with rs894673 | - | LD with rs894673 |
|  |  |  |  |  |  |  |  | - |  |
| 9q22 | rs3021523; Leu129Leu | Tomaz et al.,2012(100) | 80 | 130 | Ca | **2.39 (1.56-3.67)** | LD with rs894673 | - | LD with rs894673 |
|  |  |  |  |  |  |  |  | - |  |
| 9q22 | PolyA | Tomaz et al.,2012(100) | 80 | 130 | Ca | **2.44 (1.61-3.68)** |  | - |  |
|  |  |  |  |  |  |  |  | - |  |
| 14q13 | rs944289 | Gudmundsson et al.,2009(98) | 1006 | 37196 | Ca | **1.37 (1.24-1.52)** | **1.25 (1.05-1.49)** | - | 1.13 (0.81-1.58)a |
|  |  |  |  |  |  |  |  | - | **1.48 (1.04-2.09)b** |
|  |  | Takahashi et al.,2010(99) | 660 | 820 | Ca | 1.13 (0.95-1.36) |  | - |  |
|  |  |  |  |  |  |  |  | - |  |
|  |  | Jones et al.,2012(96) | 753 | 6120 | Ca | **1.33 (1.19-1.49)** |  | **1.31 (1.02-1.68)a** |  |
|  |  |  |  |  |  |  |  | **1.76 (1.37-2.25)b** |  |
|  |  | Liyanarachchi et al.,2013(93) | 605 | 916 | Ca | **1.25 (1.08-1.46)** |  | - |  |
|  |  |  |  |  |  |  |  | - |  |
|  |  | Liyanarachchi et al.,2013(93) | 1633 | 1663 | Ca | **1.22 (1.09-1.38)** |  | - |  |
|  |  |  |  |  |  |  |  | - |  |
|  |  | Matsuse et al.,2013(101) | 467 | 2766 | As | **1.21 (1.04-1.39)** |  | - |  |
|  |  |  |  |  |  |  |  | - |  |
|  |  | Wang et al.,2013(94) | 845 | 1005 | As | **1.53 (1.33-1.72)** |  | **1.87 (1.50-2.34)a** |  |
|  |  |  |  |  |  |  |  | **2.23 (1.71-2.90)b** |  |
| 14q13 | rs116909374 | Gudmundsson et al.,2012(92) | 1138 | 5340 | Ca | **2.09 (1.68-2.60)** |  | - |  |
|  |  |  |  |  |  |  |  | - |  |
|  |  | Liyanarachchi et al.,2013(93) | 605 | 916 | Ca | **2.28 (1.57-3.36)** |  | - |  |
|  |  |  |  |  |  |  |  | - |  |
|  |  | Liyanarachchi et al.,2013(93) | 1633 | 1663 | Ca | **1.66 (1.13-2.44)** |  | - |  |
|  |  |  |  |  |  |  |  | - |  |

Population: Af, African; As, Asian; Ca, Caucasian; Mi, Mixed.

a, Heterozygotes; b, Rare homozygotes.

**Table S2.** Data published in literature where only one genetic model (either dominant or recessive) was reported in the manuscript. No allelic OR or additive model could be evaluated according to the data reported in the manuscript.

| **Gene or Locus** | **dbSNP ID; Variant** | **Reference** | **Cases** | **Contr.** | **Pop.** | **Published OR**  **(dominant model)** | **OR of the dominant model**  **(present GWAS)** | **Published OR (recessive model)** | **OR of the recessive model**  **(present GWAS)** |
| --- | --- | --- | --- | --- | --- | --- | --- | --- | --- |
| **DNA repair** | | | | | | | | | |
| *ATM* | rs228589; -736A>T | Xu et al., 2012(7) | 590 | 881 | Mi | 0.80 (0.60-1.00) | 1.09 (0.86-1.39) |  |  |
| *ATM* | rs189037; -570C>T | Xu et al., 2012(7) | 590 | 883 | Mi | 0.80 (0.60-1.00) | LD with rs228589 |  |  |
| *ATM* | rs1800057; Pro1054Arg | Xu et al., 2012(7) | 586 | 876 | Mi | **1.90 (1.10-3.10)** |  |  |  |
| *ATM* | rs1801516; Asp1853Asn | Xu et al.,2012(7) | 592 | 885 | Mi | 0.90 (0.70-1.10) |  |  |  |
| *XRCC1* | rs25489; Arg280His | Sigurdson et al.,2009(4) | 865 | 896 | Ca | 1.00 (0.70-1.30) | 0.83 (0.60-1.17) |  |  |
| **Cell-cycle regulation and apoptosis** | | | | | | | | | |
| *CDKN2A* | rs3731217 | Zhang et al.,2013(103) | 303 | 511 | Mi | **1.70 (1.20-2.30)** | 0.96 (0.73-1.27) |  |  |
| *CDKN2A* | rs3088440 | Zhang et al.,2013(103) | 303 | 511 | Mi | 1.10 (0.70-1.50) |  |  |  |
| *MDM2* | rs2279744 | Zhang et al.,2013(103) | 303 | 511 | Mi |  |  | **1.50 (1.10-2.00)** | 1.27 (0.91-1.77) |
| *MDM2* | rs937283 | Zhang et al.,2013(103) | 303 | 511 | Mi | 1.00 (0.70-1.30) | 1.09 (0.85-1.39) |  |  |
| *TP53* | rs1042522; Pro72Arg | Bufalo et al.,2006(46) | 63 | 116 | Mi | **3.52 (1.69-7.36)** | 0.97 (0.76-1.24) |  |  |
| *CYP1A1* | rs4646903; 3801T>C_m1 | Bufalo et al.,2006(46) | 139 | 277 | Mi | **0.56 (0.36-0.89)** | 1.32 (0.97-1.80) |  |  |
|  |  | Guilhen et al.,2009(47) | 164 | 196 | Mi | **0.49 (0.27-0.90)** |  |  |  |
| *CYP1A1* | rs1048943; Ile462Val_m2 | Bufalo et al.,2006(46) | 136 | 277 | Mi | 0.96 (0.62-1.49) |  |  |  |
|  |  | Guilhen et al.,2009(47) | 164 | 196 | Mi | 1.31 (0.73-2.34) |  |  |  |
| *GSTP1* | rs1695; Ile105Val | Gaspar et al.,2004(42) | 103 | 204 | Ca | 1.25 (0.77-2.03) | 1.02 (0.80-1.31) |  |  |
|  |  | Bufalo et al.,2006(46) | 180 | 203 | Mi | 0.77 (0.50-1.19) |  |  |  |
|  |  | Guilhen et al.,2009(47) | 195 | 196 | Mi | 1.28 (0.84-2.49) |  |  |  |
|  | **Meta-analyses from:** | Adjadj et al.,2009(48) | 348 | 523 | Mi | 1.10 (0.80-1.50) |  |  |  |
|  |  | Li et al.,2012(49) | 514 | 534 | Ca | 0.81 (0.62-1.06) |  |  |  |
| *GSTO1* | rs4925; Ala140Asp | Bufalo et al.,2006(46) | 110 | 184 | Mi | 1.49 (0.74-3.00) | 0.99 (0.77-1.27) |  |  |
| *NAT1* | rs11777998 | Asc.-Kilfoy et al.,2012(38) | NA | NA | Ca | 1.10 (0.76-1.59) | 0.99 (0.75-1.30) |  |  |
| *NAT2* | rs1041983; Tyr94Tyr | Guilhen et al.,2009(47) | 195 | 196 | Mi | **0.24 (0.15-0.38)** | 1.03 (0.80-1.31) |  |  |
| *NAT2* | rs1799930; Arg197Gln | Guilhen et al.,2009(47) | 164 | 196 | Mi | 0.65 (0.40-1.06) |  |  |  |
| *NAT2* | rs1799929; Leu161Leu | Guilhen et al.,2009(47) | 164 | 196 | Mi | 0.94 (0.59-1.50) |  |  |  |
| *NAT2* | rs1208; Arg268Lys | Guilhen et al.,2009(47) | 195 | 196 | Mi | **1.88 (1.19-2.97)** | 0.94 (0.73-1.23) |  |  |
| *NAT2* | rs1799931; Gly286Gln | Guilhen et al.,2009(47) | 164 | 196 | Mi | 0.62 (0.32-2.01) |  |  |  |
| *NAT2* | rs1801279; Arg64Gln | Guilhen et al.,2009(47) | 195 | 196 | Mi | **0.15 (0.07-0.35)** |  |  |  |
| **Thyroid function** | | | | | | | | | |
| *TSHR* | rs2234919; Pro52Thr | Matakidou et al.,2004(55) | 304 | 317 | Ca | 0.90 (0.50-1.50) |  |  |  |
| *TSHR* | rs1991517; Asp727Glu | Matakidou et al.,2004(55) | 304 | 324 | Ca | 0.80 (0.40-1.30) |  |  |  |
|  |  | Lönn et al.,2007(59) | 160 | 483 | Mi | 0.80 (0.40-1.30) |  |  |  |
| **MAPK pathway** | | | | | | | | | |
| *EPAC* | rs12422983; Gly332Ser | Sigurdson et al.,2009(4) | 811 | 826 | Ca | 1.00 (0.80-1.20) | 0.88 (0.68-1.13) |  |  |
| *GFRA1* | rs45568534; -193C>G | Sigurdson et al.,2009(4) | 871 | 902 | Ca | **1.80 (1.00-3.10)** |  |  |  |
|  |  | Lönn et al.,2007(59) | 161 | 477 | Mi | 0.70 (0.30-1.50) |  |  |  |
| *GFRA3* | rs77536832; IVS7+39G>A | Sigurdson et al.,2009(4) | 847 | 881 | Ca | 0.90 (0.70-1.20) |  |  |  |
|  |  | Lönn et al.,2007(59) | 160 | 485 | Mi | 1.40 (0.80-2.20) |  |  |  |
| **Other cancer genes** | | | | | | | | | |
| *IGFBP3* | rs2132571 | Xu et al.,2012(83) | 173 | 401 | Ca | 0.80 (0.60-1.10) | 1.03 (0.81-1.31) |  |  |
| *IGFBP3* | rs2132572 | Xu et al.,2012(83) | 156 | 401 | Ca | **0.60 (0.40-0.80)** | 0.86 (0.66-1.13) |  |  |
| *IGFBP3* | rs2854744 | Xu et al.,2012(83) | 173 | 401 | Ca | **1.60 (1.00-2.40)** | 0.96 (0.74-1.26) |  |  |
| *IGFBP3* | rs13241830 | Xu et al.,2012(83) | 173 | 401 | Ca | 0.80 (0.60-1.20) | LD with rs2132571 |  |  |

Population: Af, African; As, Asian; Ca, Caucasian; Mi, Mixed.

**Table S3.** Meta-analyses of the literature data for the SNPs evaluated in two or more than one study.

| **Gene or Locus** | **dbSNP ID; Variant** | **OR**  **(allelic model)** | **Pass** | **OR**  **(additive model)** | **Pass** |
| --- | --- | --- | --- | --- | --- |
| **DNA repair** | |  |  |  |  |
| *ADPRT* | rs1136410; Val762Ala | 1.21 (0.99-1.46) | 0.06 | 1.39 (1.00-1.94)a | 0.05 |
|  |  |  |  | - |  |
| *APEX1* | rs1130409; Asp148Glu | 1.05 (0.97-1.13) | 0.25 | 1.22 (0.95-1.33)a | 0.18 |
|  |  |  |  | 1.06 (0.85-131)b | 0.62 |
| *ATM* | rs664677; IVS22-77T>C | 1.06 (0.91-1.23) | 0.45 | 1.11 (0.88-1.41)a | 0.36 |
|  |  |  |  | 1.11 (0.80-1.53)b | 0.53 |
| *BRCA1* | rs799917; Pro871Leu | 0.85 (0.71-1.01) | 0.07 | 0.79 (0.61-1.03)a | 0.08 |
|  |  |  |  | 0.77 (0.53-1.11)b | 0.16 |
| *BRCA1* | rs16941; Glu1038Gly | 0.87 (0.71-1.01) | 0.15 | 0.78 (0.60-1.01)a | 0.06 |
|  |  |  |  | 0.88 (0.59-1.31)b | 0.52 |
| *BRCA1* | rs16942; Lys1183Arg | 0.82 (0.68-0.99) | 0.03 | 0.75 (0.58-0.97)a | 0.03 |
|  |  |  |  | 0.74 (0.47-1.16)b | 0.19 |
| *BRCA1* | rs1799966; Ser1613Gly | 0.86 (0.72-1.04) | 0.12 | 0.83 (0.64-1.07)a | 0.14 |
|  |  |  |  | 0.78 (0.50-1.20)b | 0.25 |
| *BRCA2* | rs144848; Asn372His | 1.08 (0.94-1.25) | 0.27 | 1.06 (0.89-1.27)a | 0.51 |
|  |  |  |  | 1.21 (0.82-1.79)b | 0.34 |
| *OGG1* | rs1052133; Ser326Cys | 0.96 (0.78-1.18) | 0.68 | 0.90 (0.70-1.15)a | 0.39 |
|  |  |  |  | - |  |
| *XRCC1* | rs1799782; Arg194Trp | 1.00 (0.88-1.13) | 0.95 | 0.96 (0.83-1.12)a | 0.63 |
|  |  |  |  | 0.95 (0.67-1.36)b | 0.79 |
| *XRCC1* | rs25489; Arg280His | 1.03 (0.86-1.24) | 0.73 | 1.03 (0.84-1.25)a | 0.79 |
|  |  |  |  | 1.01 (0.51-1.97)b | 0.99 |
| *XRCC1* | rs25487; Arg399Gln | 0.95 (0.88-1.03) | 0.24 | 0.93 (0.80-1.09)a | 0.37 |
|  |  |  |  | 0.98 (0.77-1.25)b | 0.87 |
| *XRCC2* | rs3218536; Arg188His | 1.01 (0.77-1.33) | 0.92 | 0.76 (0.42-1.40)a | 0.38 |
|  |  |  |  | - |  |
| *XRCC3* | rs861539; Thr241Met | 1.11 (0.95-1.29) | 0.18 | 1.01 (0.81-1.27)a | 0.94 |
|  |  |  |  | 1.29 (0.93-1.78)b | 0.13 |
| *XRCC7* | rs7830743; Ile3434Thr | 1.40 (1.06-1.86) | 0.02 | 1.56 (1.13-2.16)a | 0.01 |
|  |  |  |  | 1.13 (0.40-3.19)b | 0.81 |
| **Cell-cycle regulation and apoptosis** | |  |  |  |  |
| *BCL2* | rs2279115; -938A>C | 1.19 (094-1.52) | 0.15 | 0.99 (0.69-1.43)a | 0.97 |
|  |  |  |  | 1.60 (0.96-2.66)b | 0.07 |
| *TP53* | rs1042522; Pro72Arg | 1.15 (0.98-1.35) | 0.09 | 1.04 (0.83-1.31)a | 0.72 |
|  |  |  |  | 1.45 (0.99-2.11)b | 0.05 |
| *WDR3* | rs4658973 | 0.58 (0.46-0.74) | 7.07×10-6 | 0.52 (0.37-0.74)a | 7.07×10-6 |
|  |  |  |  | 0.41 (0.24-0.72)b | 1.46×10-3 |
| **Xenobiotic metabolism** | |  |  |  |  |
| *CYP1A1* | rs4646903; 3801T>C_m1 | - |  | 1.06 (064-1.75)a | 0.84 |
|  |  |  |  | 1.94 (0.87-4.32)b | 0.11 |
| *CYP1A1* | rs1048943; Ile462Val_m2 | 1.07 (0.78-1.53)c | 0.69 |  |  |
| *GSTM1* | GSTM1*0 | - |  | - |  |
|  |  |  |  | 1.12 (0.97-1.28)b | 0.13 |
| *GSTT1* | GSTT1*0 | - |  | - |  |
|  |  |  |  | 1.50 (1.26-1.78)b | 4.22×10-6 |
| *GSTP1* | rs1695; Ile105Val | 1.01 (0.82-1.25) | 0.93 | 0.96 (0.71-1.29)a | 0.77 |
|  |  |  |  | 0.98 (0.64-1.50)b | 0.93 |
| *MTHFR* | rs1801133; Ala222Val | 1.31 (1.03-1.65) | 0.03 | 1.25 (0.92-1.70)a | 0.15 |
|  |  |  |  | 2.06 (1.02-4.18)b | 0.05 |
| *NAT2* | rs1799930; Arg197Gln | 1.17 (0.95-1.44) | 0.15 | 1.26 (0.95-1.68)a | 0.11 |
|  |  |  |  | 1.19 (0.75-1.88)b | 0.46 |
| **Thyroid function** | |  |  |  |  |
| *TPO* | rs2048722; 1495800A>G | 0.96 (0.87-1.06) | 0.41 | 1.08 (0.92-1.27)a | 0.35 |
|  |  |  |  | 0.89 (0.73-1.09)b | 0.26 |
| *TPO* | rs732609; Thr725Pro | 0.95 (0.86-1.04) | 0.27 | 1.01 (0.87-1.17)a | 0.93 |
|  |  |  |  | 0.85 (0.69-1.04)b | 0.12 |
| *TPO* | rs1042589; 1546327C>G | 0.94 (0.85-1.04) | 0.21 | 0.95 (0.81-1.12)a | 0.54 |
|  |  |  |  | 0.88 (0.72-1.07)b | 0.20 |
| *TSHR* | rs1991517; Asp727Glu | 0.80 (0.53-1.21)c | 0.29 |  |  |
| *TSHR* | rs2075179; Asn187Asn | 0.95 (0.83-1.10) | 0.50 | 0.93 (0.78-1.12)a | 0.47 |
|  |  |  |  | 0.97 (0.71-1.24)b | 0.85 |
| *TSHR* | IVS1+8651A>G | 1.04 (0.89-1.21) | 0.62 | 0.96 (0.80-1.15)a | 0.63 |
|  |  |  |  | 1.43 (0.90-2.28)b | 0.13 |
| **MAPK pathway** | |  |  |  |  |
| *GFRA1* | rs45568534; -193C>G | 1.32 (0.83-2.09)c | 0.24 |  |  |
| *GFRA3* | rs77536832; IVS7+39G>A | 0.99 (0.78-1.26)c | 0.95 |  |  |
| *RET* | rs1800858; Ala45Ala | 0.94 (0.83-1.06) | 0.28 | 0.88- (0.74-1.04)a | 0.12 |
|  |  |  |  | 0.94 (0.71-1.24)b | 0.65 |
| *RET* | rs1799939; Gly691Ser | 1.07 (0.93-1.24) | 0.32 | 1.04 (0.85-1.19)a | 0.66 |
|  |  |  |  | 1.25 (0.82-1.88)b | 0.30 |
| *RET* | rs1800861; Leu769Leu | 1.02 (0.91-1.15) | 0.75 | 1.00 (0.85-1.19)a | 0.97 |
|  |  |  |  | 1.06 (0.82-1.37)b | 0.68 |
| *RET* | rs1800862; Ser836Ser | 1.38 (1.04-1.83) | 0.03 | 1.40 (1.05-1.87)a | 0.02 |
|  |  |  |  | - |  |
| **GWAS or intergenic regions** | |  |  |  |  |
| 2q35 | rs966423 | 1.28 (1.20-1.36) | 1.06×10-14 | - |  |
|  |  |  |  | - |  |
| 5q24 | rs2910164 | 1.02 (0.93-1.10) | 0.72 | 1.10 (0.98-1.23)a | 0.10 |
|  |  |  |  | 0.88 (0.72-1.08)a | 0.21 |
| 8p12 | rs2439302 | 1.35 (1.26-1.43) | 1.47×10-20 | - |  |
|  |  |  |  | - |  |
| 8q24 | rs6983267 | 1.07 (0.99-1.15) | 0.07 | 1.02 (0.90-1.17)a | 0.74 |
|  |  |  |  | 1.12 (0.97-1.30)b | 0.14 |
| 9q22 | rs965513 | 1.83 (1.74-1.92) | <10-20 | - |  |
|  |  |  |  | - |  |
| 9q22 | rs3021526; Ser275Ser | 1.40 (1.19-1.65) | 5.44×10-5 | - |  |
|  |  |  |  | - |  |
| 9q22 | rs1867277 | 1.66 (1.53-1.81) | <10-20 | - |  |
|  |  |  |  | - |  |
| 14q13 | rs944289 | 1.31 (1.25-1.37) | <10-20 | - |  |
|  |  |  |  | - |  |
| 14q13 | rs116909374 | 2.14 (1.77-2.58) | 2.48×10-15 | - |  |
|  |  |  |  | - |  |

a, heterozygotes; b, rare homozygotes; c, only dominant model available.

**REFERENCES**

1. Santos LS, Branco SC, Silva SN, Azevedo AP, Gil OM, Manita I, et al. Polymorphisms in base excision repair genes and thyroid cancer risk. OncolRep. 2012;28:1859-68.

2. Chiang FY, Wu CW, Hsiao PJ, Kuo WR, Lee KW, Lin JC, et al. Association between polymorphisms in DNA base excision repair genes XRCC1, APE1, and ADPRT and differentiated thyroid carcinoma. ClinCancer Res. 2008;14:5919-24.

3. Neta G, Brenner AV, Sturgis EM, Pfeiffer RM, Hutchinson AA, schebrook-Kilfoy B, et al. Common genetic variants related to genomic integrity and risk of papillary thyroid cancer. Carcinogenesis. 2011;32:1231-7.

4. Sigurdson AJ, Land CE, Bhatti P, Pineda M, Brenner A, Carr Z, et al. Thyroid nodules, polymorphic variants in DNA repair and RET-related genes, and interaction with ionizing radiation exposure from nuclear tests in Kazakhstan. RadiatRes. 2009;171:77-88.

5. Akulevich NM, Saenko VA, Rogounovitch TI, Drozd VM, Lushnikov EF, Ivanov VK, et al. Polymorphisms of DNA damage response genes in radiation-related and sporadic papillary thyroid carcinoma. EndocrRelat Cancer. 2009;16:491-503.

6. Gu Y, Yu Y, Ai L, Shi J, Liu X, Sun H, et al. Association of the ATM gene polymorphisms with papillary thyroid cancer. Endocrine. 2013.

7. Xu L, Morari EC, Wei Q, Sturgis EM, Ward LS. Functional variations in the ATM gene and susceptibility to differentiated thyroid carcinoma. JClinEndocrinolMetab. 2012;97:1913-21.

8. Sturgis EM, Zhao C, Zheng R, Wei Q. Radiation response genotype and risk of differentiated thyroid cancer: a case-control analysis. Laryngoscope. 2005;115:938-45.

9. Xu L, Doan PC, Wei Q, Liu Y, Li G, Sturgis EM. Association of BRCA1 functional single nucleotide polymorphisms with risk of differentiated thyroid carcinoma. Thyroid. 2012;22:35-43.

10. Silva SN, Gil OM, Oliveira VC, Cabral MN, Azevedo AP, Faber A, et al. Association of polymorphisms in ERCC2 gene with non-familial thyroid cancer risk. Cancer EpidemiolBiomarkers Prev. 2005;14:2407-12.

11. Gomes BC, Silva SN, Azevedo AP, Manita I, Gil OM, Ferreira TC, et al. The role of common variants of non-homologous end-joining repair genes XRCC4, LIG4 and Ku80 in thyroid cancer risk. OncolRep. 2010;24:1079-85.

12. Bastos HN, Antao MR, Silva SN, Azevedo AP, Manita I, Teixeira V, et al. Association of polymorphisms in genes of the homologous recombination DNA repair pathway and thyroid cancer risk. Thyroid. 2009;19:1067-75.

13. Garcia-Quispes WA, Perez-Machado G, Akdi A, Pastor S, Galofre P, Biarnes F, et al. Association studies of OGG1, XRCC1, XRCC2 and XRCC3 polymorphisms with differentiated thyroid cancer. MutatRes. 2011;709-710:67-72.

14. Siraj AK, Al-Rasheed M, Ibrahim M, Siddiqui K, Al-Dayel F, Al-Sanea O, et al. RAD52 polymorphisms contribute to the development of papillary thyroid cancer susceptibility in Middle Eastern population. JEndocrinolInvest. 2008;31:893-9.

15. Ho T, Li G, Lu J, Zhao C, Wei Q, Sturgis EM. Association of XRCC1 polymorphisms and risk of differentiated thyroid carcinoma: a case-control analysis. Thyroid. 2009;19:129-35.

16. Fard-Esfahani P, Fard-Esfahani A, Fayaz S, Ghanbarzadeh B, Saidi P, Mohabati R, et al. Association of Arg194Trp, Arg280His and Arg399Gln polymorphisms in X-ray repair cross-complementing group 1 gene and risk of differentiated thyroid carcinoma in Iran. Iran BiomedJ. 2011;15:73-8.

17. Ryu RA, Tae K, Min HJ, Jeong JH, Cho SH, Lee SH, et al. XRCC1 polymorphisms and risk of papillary thyroid carcinoma in a Korean sample. JKorean MedSci. 2011;26:991-5.

18. Qian K, Liu KJ, Xu F, Chen XY, Chen GN, Yi WJ, et al. X-ray repair cross-complementing group 1(XRCC1) genetic polymorphisms and thyroid carcinoma risk: a meta-analysis. Asian PacJCancer Prev. 2012;13:6385-90.

19. Bao Y, Jiang L, Zhou JY, Zou JJ, Zheng JY, Chen XF, et al. XRCC1 gene polymorphisms and the risk of differentiated thyroid carcinoma (DTC): a meta-analysis of case-control studies. PLoSOne. 2013;8:e64851.

20. Hu Z, Hu X, Long J, Su L, Wei B. XRCC1 polymorphisms and differentiated thyroid carcinoma risk: a meta-analysis. Gene. 2013;528:67-73.

21. Rahimi M, Fayaz S, Fard-Esfahani A, Modarressi MH, Akrami SM, Fard-Esfahani P. The role of Ile3434Thr XRCC7 gene polymorphism in differentiated thyroid cancer risk in an Iranian population. Iran BiomedJ. 2012;16:218-22.

22. Eun YG, Hong IK, Kim SK, Park HK, Kwon S, Chung DH, et al. A Polymorphism (rs1801018, Thr7Thr) of BCL2 is Associated with Papillary Thyroid Cancer in Korean Population. ClinExpOtorhinolaryngol. 2011;4:149-54.

23. Wang YX, Zhao L, Wang XY, Liu CM, Yu SG. Role of Caspase 8, Caspase 9 and Bcl-2 polymorphisms in papillary thyroid carcinoma risk in Han Chinese population. MedOncol. 2012;29:2445-51.

24. Yazdani N, Sayahpour FA, Haghpanah V, Amiri P, Shahrabi-Farahani M, Moradi M, et al. Survivin gene polymorphism association with papillary thyroid carcinoma. PatholResPract. 2012;208:100-3.

25. Wang YX, Li ML, Yu SG, Liu CM, Han Y, Wang XY. The association between the Survivin A9194G exon polymorphisms and papillary thyroid carcinoma risk in the Han Chinese population. PatholResPract. 2013;209:151-4.

26. Landa I, Montero-Conde C, Malanga D, De GS, Pita G, Leandro-Garcia LJ, et al. Allelic variant at -79 (C>T) in CDKN1B (p27Kip1) confers an increased risk of thyroid cancer and alters mRNA levels. EndocrRelat Cancer. 2010;17:317-28.

27. Debniak T, Scott RJ, Huzarski T, Byrski T, Rozmiarek A, Debniak B, et al. CDKN2A common variant and multi-organ cancer risk--a population-based study. IntJCancer. 2006;118:3180-2.

28. Ho T, Li G, Zhao C, Zheng R, Wei Q, Sturgis EM. Fas single nucleotide polymorphisms and risk of thyroid and salivary gland carcinomas: a case-control analysis. Head Neck. 2008;30:297-305.

29. Rogounovitch TI, Saenko VA, Ashizawa K, Sedliarou IA, Namba H, Abrosimov AY, et al. TP53 codon 72 polymorphism in radiation-associated human papillary thyroid cancer. OncolRep. 2006;15:949-56.

30. Granja F, Morari J, Morari EC, Correa LA, Assumpcao LV, Ward LS. Proline homozygosity in codon 72 of p53 is a factor of susceptibility for thyroid cancer. Cancer Lett. 2004;210:151-7.

31. Reis AA, Silva DM, Curado MP, da Cruz AD. Involvement of CYP1A1, GST, 72TP53 polymorphisms in the pathogenesis of thyroid nodules. GenetMolRes. 2010;9:2222-9.

32. Akdi A, Gimenez EM, Garcia-Quispes W, Pastor S, Castell J, Biarnes J, et al. WDR3 gene haplotype is associated with thyroid cancer risk in a Spanish population. Thyroid. 2010;20:803-9.

33. Baida A, Akdi M, Gonzalez-Flores E, Galofre P, Marcos R, Velazquez A. Strong association of chromosome 1p12 loci with thyroid cancer susceptibility. Cancer EpidemiolBiomarkers Prev. 2008;17:1499-504.

34. Kim SK, Park HJ, Seok H, Jeon HS, Kim JW, Chung JH, et al. Missense polymorphisms in XIAP-associated factor-1 (XAF1) and risk of papillary thyroid cancer: correlation with clinicopathological features. Anticancer Res. 2013;33:2205-10.

35. Siraj AK, Ibrahim M, Al-Rasheed M, Abubaker J, Bu R, Siddiqui SU, et al. Polymorphisms of selected xenobiotic genes contribute to the development of papillary thyroid cancer susceptibility in Middle Eastern population. BMCMedGenet. 2008;9:61.

36. Lemos MC, Carrilho F, Rodrigues F, Coutinho E, Gomes L, Carvalheiro M, et al. Genetic polymorphism of CYP2D6 influences susceptibility to papillary thyroid cancer. ClinEndocrinol(Oxf). 2007;67:180-3.

37. Schonfeld SJ, Neta G, Sturgis EM, Pfeiffer RM, Hutchinson AA, Xu L, et al. Common genetic variants in sex hormone pathway genes and papillary thyroid cancer risk. Thyroid. 2012;22:151-6.

38. Aschebrook-Kilfoy B, Neta G, Brenner AV, Hutchinson A, Pfeiffer RM, Sturgis EM, et al. Common genetic variants in metabolism and detoxification pathways and the risk of papillary thyroid cancer. EndocrRelat Cancer. 2012;19:333-44.

39. Lin JC, Kuo WR, Chiang FY, Hsiao PJ, Lee KW, Wu CW, et al. Glutathione peroxidase 3 gene polymorphisms and risk of differentiated thyroid cancer. Surgery. 2009;145:508-13.

40. Canbay E, Dokmetas S, Canbay EI, Sen M, Bardakci F. Higher glutathione transferase GSTM1 0/0 genotype frequency in young thyroid carcinoma patients. CurrMedResOpin. 2003;19:102-6.

41. Hernandez A, Cespedes W, Xamena N, Surralles J, Creus A, Galofre P, et al. Glutathione S-transferase polymorphisms in thyroid cancer patients. Cancer Lett. 2003;190:37-44.

42. Gaspar J, Rodrigues S, Gil OM, Manita I, Ferreira TC, Limbert E, et al. Combined effects of glutathione S-transferase polymorphisms and thyroid cancer risk. Cancer GenetCytogenet. 2004;151:60-7.

43. Lemos MC, Coutinho E, Gomes L, Carrilho F, Rodrigues F, Regateiro FJ, et al. Combined GSTM1 and GSTT1 null genotypes are associated with a lower risk of papillary thyroid cancer. JEndocrinolInvest. 2008;31:542-5.

44. Hernandez A, Xamena N, Surralles J, Galofre P, Velazquez A, Creus A, et al. Role of GST and NAT2 polymorphisms in thyroid cancer. JEndocrinolInvest. 2008;31:1025-31.

45. Ho T, Zhao C, Zheng R, Liu Z, Wei Q, Sturgis EM. Glutathione S-transferase polymorphisms and risk of differentiated thyroid carcinomas: a case-control analysis. ArchOtolaryngolHead Neck Surg. 2006;132:756-61.

46. Bufalo NE, Leite JL, Guilhen AC, Morari EC, Granja F, Assumpcao LV, et al. Smoking and susceptibility to thyroid cancer: an inverse association with CYP1A1 allelic variants. EndocrRelat Cancer. 2006;13:1185-93.

47. Guilhen AC, Bufalo NE, Morari EC, Leite JL, Assumpcao LV, Tincani AJ, et al. Role of the N-acetyltransferase 2 detoxification system in thyroid cancer susceptibility. ClinCancer Res. 2009;15:406-12.

48. Adjadj E, Schlumberger M, de VF. Germ-line DNA polymorphisms and susceptibility to differentiated thyroid cancer. Lancet Oncol. 2009;10:181-90.

49. Li J, Long J, Hu Y, Tan A, Guo X, Zhang S. Glutathione S-transferase M1, T1, and P1 polymorphisms and thyroid cancer risk: a meta-analysis. Cancer Epidemiol. 2012;36:e333-e40.

50. Granja F, Morari J, Morari EC, Correa LA, Assumpcao LV, Ward LS. GST profiling may be useful in the screening for thyroid nodule malignancy. Cancer Lett. 2004;209:129-37.

51. Prasad VV, Wilkhoo H. Association of the functional polymorphism C677T in the methylenetetrahydrofolate reductase gene with colorectal, thyroid, breast, ovarian, and cervical cancers. Onkologie. 2011;34:422-6.

52. Fard-Esfahani P, Fard-Esfahani A, Saidi P, Fayaz S, Mohabati R, Majdi M. An increased risk of differentiated thyroid carcinoma in Iran with the 677C-->T homozygous polymorphism in the MTHFR Gene. Cancer Epidemiol. 2011;35:56-8.

53. Ozdemir S, Silan F, Hasbek Z, Uludag A, Atik S, Erselcan T, et al. Increased T-allele frequency of 677 C>T polymorphism in the methylenetetrahydrofolate reductase gene in differentiated thyroid carcinoma. GenetTestMolBiomarkers. 2012;16:780-4.

54. Oh IH, Oh C, Yoon TY, Choi JM, Kim SK, Park HJ, et al. Association of CFTR gene polymorphisms with papillary thyroid cancer. OncolLett. 2012;3:455-61.

55. Matakidou A, Hamel N, Popat S, Henderson K, Kantemiroff T, Harmer C, et al. Risk of non-medullary thyroid cancer influenced by polymorphic variation in the thyroglobulin gene. Carcinogenesis. 2004;25:369-73.

56. Akdi A, Perez G, Pastor S, Castell J, Biarnes J, Marcos R, et al. Common variants of the thyroglobulin gene are associated with differentiated thyroid cancer risk. Thyroid. 2011;21:519-25.

57. Pastor S, Akdi A, Gonzalez ER, Castell J, Biarnes J, Marcos R, et al. Common genetic variants in pituitary-thyroid axis genes and the risk of differentiated thyroid cancer. EndocrConnect. 2012;1:68-77.

58. Cipollini M, Pastor S, Gemignani F, Castell J, Garritano S, Bonotti A, et al. TPO genetic variants and risk of differentiated thyroid carcinoma in two European populations. IntJCancer. 2013;133:2843-51.

59. Lonn S, Bhatti P, Alexander BH, Pineda MA, Doody MM, Struewing JP, et al. Papillary thyroid cancer and polymorphic variants in. Cancer EpidemiolBiomarkers Prev. 2007;16:174-7.

60. Zhang Q, Song F, Zheng H, Zhu X, Song F, Yao X, et al. Association between single-nucleotide polymorphisms of BRAF and papillary thyroid carcinoma in a Chinese population. Thyroid. 2013;23:38-44.

61. Khan MS, Pandith AA, Ul HM, Iqbal M, Khan NP, Wani KA, et al. Lack of mutational events of RAS genes in sporadic thyroid cancer but high risk associated with HRAS T81C single nucleotide polymorphism (case-control study). TumourBiol. 2013;34:521-9.

62. Kim MJ, Kim SK, Park HJ, Chung DH, Park HK, Lee JS, et al. PDGFRA promoter polymorphisms are associated with the risk of papillary thyroid cancer. MolMedRep. 2012;5:1267-70.

63. Ho T, Li G, Zhao C, Wei Q, Sturgis EM. RET polymorphisms and haplotypes and risk of differentiated thyroid cancer. Laryngoscope. 2005;115:1035-41.

64. Prasad VV, Padma K. Non-synonymous polymorphism (Gln261Arg) of 12-lipoxygenase in colorectal and thyroid cancers. FamCancer. 2012;11:615-21.

65. Brenner AV, Neta G, Sturgis EM, Pfeiffer RM, Hutchinson A, Yeager M, et al. Common single nucleotide polymorphisms in genes related to immune function and risk of papillary thyroid cancer. PLoSOne. 2013;8:e57243.

66. Ban JY, Kim MK, Park SW, Kwon KH. Interleukin-1 beta polymorphisms are associated with lymph node metastasis in Korean patients with papillary thyroid carcinoma. ImmunolInvest. 2012;41:888-905.

67. Park SW, Kim MK, Kwon KH, Kim J. Association between a promoter polymorphism (rs2192752, -1028A/C) of interleukin 1 receptor, type I (IL1R1) and location of papillary thyroid carcinoma in a Korean population. IntJImmunogenet. 2012;39:501-7.

68. Eun YG, Shin IH, Kim MJ, Chung JH, Song JY, Kwon KH. Associations between promoter polymorphism -106A/G of interleukin-11 receptor alpha and papillary thyroid cancer in Korean population. Surgery. 2012;151:323-9.

69. Plantinga TS, Costantini I, Heinhuis B, Huijbers A, Semango G, Kusters B, et al. A promoter polymorphism in human interleukin-32 modulates its expression and influences the risk and the outcome of epithelial cell-derived thyroid carcinoma. Carcinogenesis. 2013;34:1529-35.

70. Hong IK, Eun YG, Chung DH, Kwon KH, Kim DY. Association of the oncostatin m receptor gene polymorphisms with papillary thyroid cancer in the korean population. ClinExpOtorhinolaryngol. 2011;4:193-8.

71. Kim SK, Park HJ, Hong IK, Chung JH, Eun YG. A missense polymorphism (rs11466653, Met326Thr) of toll-like receptor 10 (TLR10) is associated with tumor size of papillary thyroid carcinoma in the Korean population. Endocrine. 2013;43:161-9.

72. Kim MK, Park SW, Kim SK, Park HJ, Eun YG, Kwon KH, et al. Association of Toll-like receptor 2 polymorphisms with papillary thyroid cancer and clinicopathologic features in a Korean population. JKorean MedSci. 2012;27:1333-8.

73. Huijbers A, Plantinga TS, Joosten LA, Aben KK, Gudmundsson J, den HM, et al. The effect of the ATG16L1 Thr300Ala polymorphism on susceptibility and outcome of patients with epithelial cell-derived thyroid carcinoma. EndocrRelat Cancer. 2012;19:L15-L8.

74. Kim YO, Hong IK, Eun YG, Nah SS, Lee S, Heo SH, et al. Polymorphisms in bone morphogenetic protein 3 and the risk of papillary thyroid cancer. OncolLett. 2013;5:336-40.

75. Wang YX, Zhao L, Wang XY, Liu CM, Yu SG. Association between E-cadherin (CDH1) polymorphisms and papillary thyroid carcinoma risk in Han Chinese population. Endocrine. 2012;41:526-31.

76. Park HJ, Choe BK, Kim SK, Park HK, Kim JW, Chung JH, et al. Association between collagen type XI alpha1 gene polymorphisms and papillary thyroid cancer in a Korean population. ExpTherMed. 2011;2:1111-6.

77. Rebai M, Kallel I, Charfeddine S, Hamza F, Guermazi F, Rebai A. Association of polymorphisms in estrogen and thyroid hormone receptors with thyroid cancer risk. JReceptSignalTransductRes. 2009;29:113-8.

78. Han SA, Song JY, Min SY, Park WS, Kim MJ, Chung JH, et al. A genetic association analysis of polymorphisms, rs2282695 and rs12373539, in the FOSB gene and papillary thyroid cancer. ExpTherMed. 2012;4:519-23.

79. Kitahara CM, Neta G, Pfeiffer RM, Kwon D, Xu L, Freedman ND, et al. Common obesity-related genetic variants and papillary thyroid cancer risk. Cancer EpidemiolBiomarkers Prev. 2012;21:2268-71.

80. Sheu SY, Handke S, Brocker-Preuss M, Gorges R, Frey UH, Ensinger C, et al. The C allele of the GNB3 C825T polymorphism of the G protein beta3-subunit is associated with an increased risk for the development of oncocytic thyroid tumours. JPathol. 2007;211:60-6.

81. Rebai M, Kallel I, Hamza F, Charfeddine S, Kaffel R, Guermazi F, et al. Association of EGFR and HER2 polymorphisms with risk and clinical features of thyroid cancer. GenetTestMolBiomarkers. 2009;13:779-84.

82. Cho SH, Kim SK, Kwon E, Park HJ, Kwon KH, Chung JH. Polymorphism of IGF1R is associated with papillary thyroid carcinoma in a Korean population. JInterferon Cytokine Res. 2012;32:401-6.

83. Xu L, Mugartegui L, Li G, Sarlis NJ, Wei Q, Zafereo ME, et al. Functional polymorphisms in the insulin-like binding protein-3 gene may modulate susceptibility to differentiated thyroid carcinoma in Caucasian Americans. MolCarcinog. 2012;51 Suppl 1:E158-E67.

84. Kim SK, Kim DK, Oh IH, Song JY, Kwon KH, Choe BK, et al. A missense polymorphism (rs11895564, Ala380Thr) of integrin alpha 6 is associated with the development and progression of papillary thyroid carcinoma in Korean population. JKorean SurgSoc. 2011;81:308-15.

85. Eun YG, Kim SK, Chung JH, Kwon KH. Association study of integrins beta 1 and beta 2 gene polymorphism and papillary thyroid cancer. AmJSurg. 2013;205:631-5.

86. Ozdemir S, Uludag A, Silan F, Atik SY, Turgut B, Ozdemir O. Possible roles of the xenobiotic transporter P-glycoproteins encoded by the MDR1 3435 C>T gene polymorphism in differentiated thyroid cancers. Asian PacJCancer Prev. 2013;14:3213-7.

87. Mu G, Wang H, Cai Z, Ji H. OPN -443C>T genetic polymorphism and tumor OPN expression are associated with the risk and clinical features of papillary thyroid cancer in a Chinese cohort. Cell Physiol Biochem. 2013;32:171-9.

88. Xing JC, Tufano RP, Murugan AK, Liu D, Wand G, Ladenson PW, et al. Single nucleotide polymorphism rs17849071 G/T in the PIK3CA gene is inversely associated with follicular thyroid cancer and PIK3CA amplification. PLoSOne. 2012;7:e49192.

89. Iuliano R, Palmieri D, He H, Iervolino A, Borbone E, Pallante P, et al. Role of PTPRJ genotype in papillary thyroid carcinoma risk. EndocrRelat Cancer. 2010;17:1001-6.

90. Hsiao PJ, Lu MY, Chiang FY, Shin SJ, Tai YD, Juo SH. Vascular endothelial growth factor gene polymorphisms in thyroid cancer. JEndocrinol. 2007;195:265-70.

91. Cancemi L, Romei C, Bertocchi S, Tarrini G, Spitaleri I, Cipollini M, et al. Evidences that the polymorphism Pro-282-Ala within the tumor suppressor gene WWOX is a new risk factor for differentiated thyroid carcinoma. IntJCancer. 2011;129:2816-24.

92. Gudmundsson J, Sulem P, Gudbjartsson DF, Jonasson JG, Masson G, He H, et al. Discovery of common variants associated with low TSH levels and thyroid cancer risk. NatGenet. 2012;44:319-22.

93. Liyanarachchi S, Wojcicka A, Li W, Czetwertynska M, Stachlewska E, Nagy R, et al. Cumulative Risk Impact of Five Genetic Variants Associated with Papillary Thyroid Carcinoma. Thyroid. 2013.

94. Wang YL, Feng SH, Guo SC, Wei WJ, Li DS, Wang Y, et al. Confirmation of papillary thyroid cancer susceptibility loci identified by genome-wide association studies of chromosomes 14q13, 9q22, 2q35 and 8p12 in a Chinese population. JMedGenet. 2013;50:689-95.

95. Jazdzewski K, Murray EL, Franssila K, Jarzab B, Schoenberg DR, de la CA. Common SNP in pre-miR-146a decreases mature miR expression and predisposes to papillary thyroid carcinoma. ProcNatlAcadSciUSA. 2008;105:7269-74.

96. Jones AM, Howarth KM, Martin L, Gorman M, Mihai R, Moss L, et al. Thyroid cancer susceptibility polymorphisms: confirmation of loci on chromosomes 9q22 and 14q13, validation of a recessive 8q24 locus and failure to replicate a locus on 5q24. JMedGenet. 2012;49:158-63.

97. Wei WJ, Wang YL, Li DS, Wang Y, Wang XF, Zhu YX, et al. Association between the rs2910164 polymorphism in pre-Mir-146a sequence and thyroid carcinogenesis. PLoSOne. 2013;8:e56638.

98. Gudmundsson J, Sulem P, Gudbjartsson DF, Blondal T, Gylfason A, Agnarsson BA, et al. Genome-wide association and replication studies identify four variants associated with prostate cancer susceptibility. NatGenet. 2009;41:1122-6.

99. Takahashi M, Saenko VA, Rogounovitch TI, Kawaguchi T, Drozd VM, Takigawa-Imamura H, et al. The FOXE1 locus is a major genetic determinant for radiation-related thyroid carcinoma in Chernobyl. HumMolGenet. 2010;19:2516-23.

100. Tomaz RA, Sousa I, Silva JG, Santos C, Teixeira MR, Leite V, et al. FOXE1 polymorphisms are associated with familial and sporadic nonmedullary thyroid cancer susceptibility. ClinEndocrinol(Oxf). 2012;77:926-33.

101. Matsuse M, Takahashi M, Mitsutake N, Nishihara E, Hirokawa M, Kawaguchi T, et al. The FOXE1 and NKX2-1 loci are associated with susceptibility to papillary thyroid carcinoma in the Japanese population. JMedGenet. 2011;48:645-8.

102. Landa I, Ruiz-Llorente S, Montero-Conde C, Inglada-Perez L, Schiavi F, Leskela S, et al. The variant rs1867277 in FOXE1 gene confers thyroid cancer susceptibility through the recruitment of USF1/USF2 transcription factors. PLoSGenet. 2009;5:e1000637.

103. Zhang F, Xu L, Wei Q, Song X, Sturgis EM, Li G. Significance of MDM2 and P14 ARF polymorphisms in susceptibility to differentiated thyroid carcinoma. Surgery. 2013;153:711-7.
